# Supplementary material for: Effects of wine-cap Stropharia cultivation on soil nutrients and bacterial communities in forestlands of northern China
Source: PubMed Central journal article supplement (PMC6183509; doi:10.7717/peerj.5741), 2018-10-09

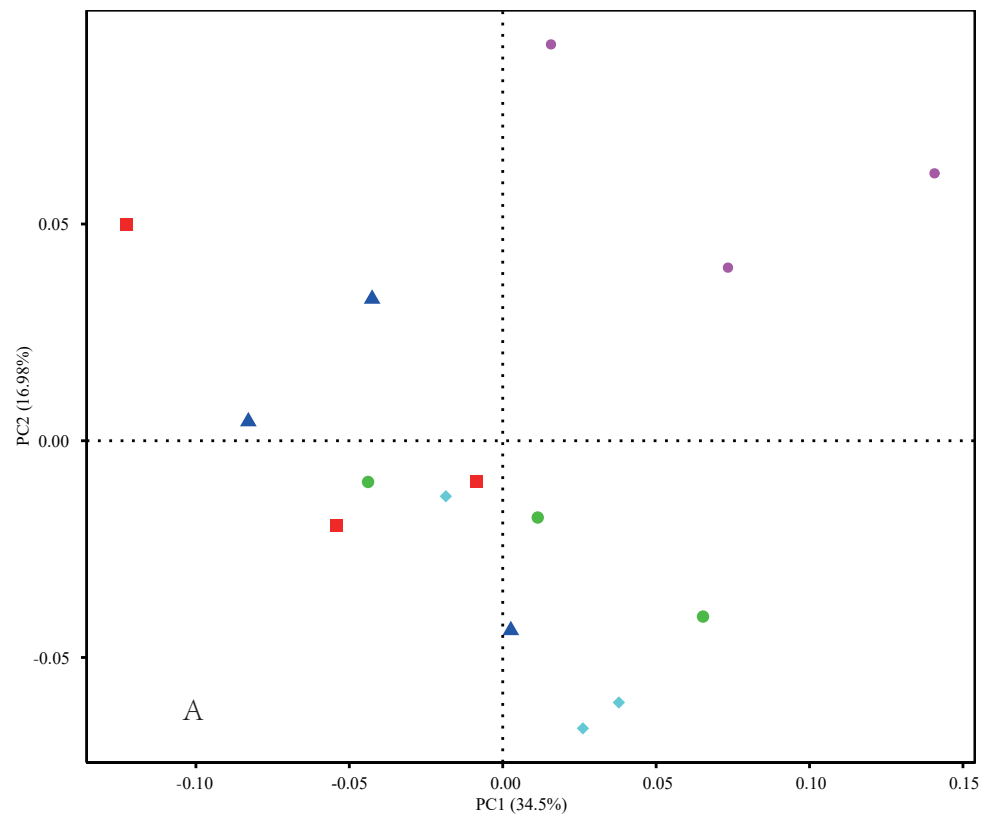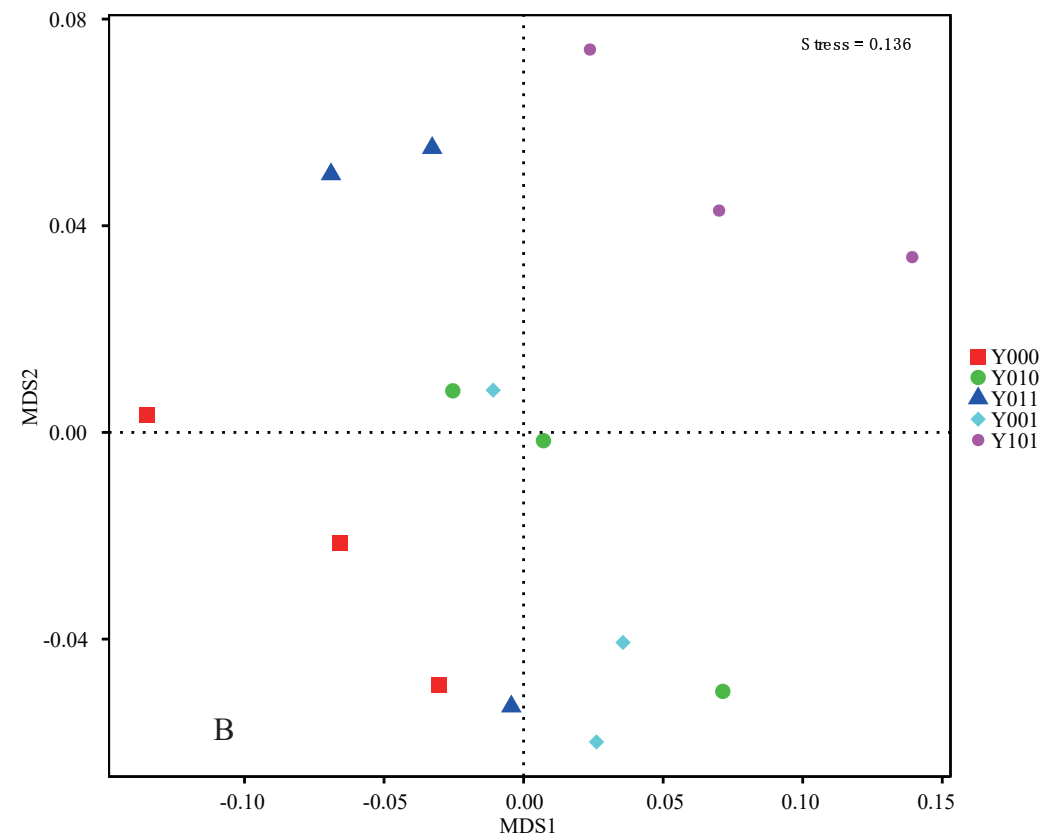

Supplement: peerj-06-5741-s005.pdf [file peerj-06-5741-s005.pdf]
