# Supplementary material for: Effects of wine-cap Stropharia cultivation on soil nutrients and bacterial communities in forestlands of northern China
Source: PubMed Central journal article supplement (PMC6183509; doi:10.7717/peerj.5741), 2018-10-09

- P--ACTINOBACTERIA
- P--BACTEROIDETES
- P--CHLOROFLEXI
- P--FIRMICUTES
- P--NITROSPIRAE
- P--PROTEOBACTERIA

- A:c--Nitrospira
- B:o--Nitrospirales
- C:c--Betaproteobacteria
- D:o--Burkholderiales
- E:f--Comamonadaceae
- F:o--Nitrosomonadales
- G:f--Nitrosomonadaceae
- H:g--unidentified Nitrosomonadaceae
- I:c--Gammaproteobacteria
- J:o--Xanthomonadales
- K:f--Xanthomonadaceae
- L:c--Alphaproteobacteria
- M:o--Rhodospirillales
- N:f--Rhodospirillaceae
- O:g--unidentified Rhodospirillaceae
- P:o--Rhizobiales
- Q:f--Bradyrhizobiaceae
- R:f--Xanthobacteraceae
- S:c--Anaerolineae
- T:o--Anaerolineales
- U:f--Anaerolineaceae
- V:g--Ornatilinea
- W:c--Thermoleophilia
- X:c--unidentified Actinobacteria
- Y:o--Micrococcales
- Z:f--Micrococcaceae
- a:g--Arthrobacter
- b:c--Bacilli
- c:o--Bacillales
- d:c--Clostridia
- e:o--Clostridiales
- f:o--Clostridiales

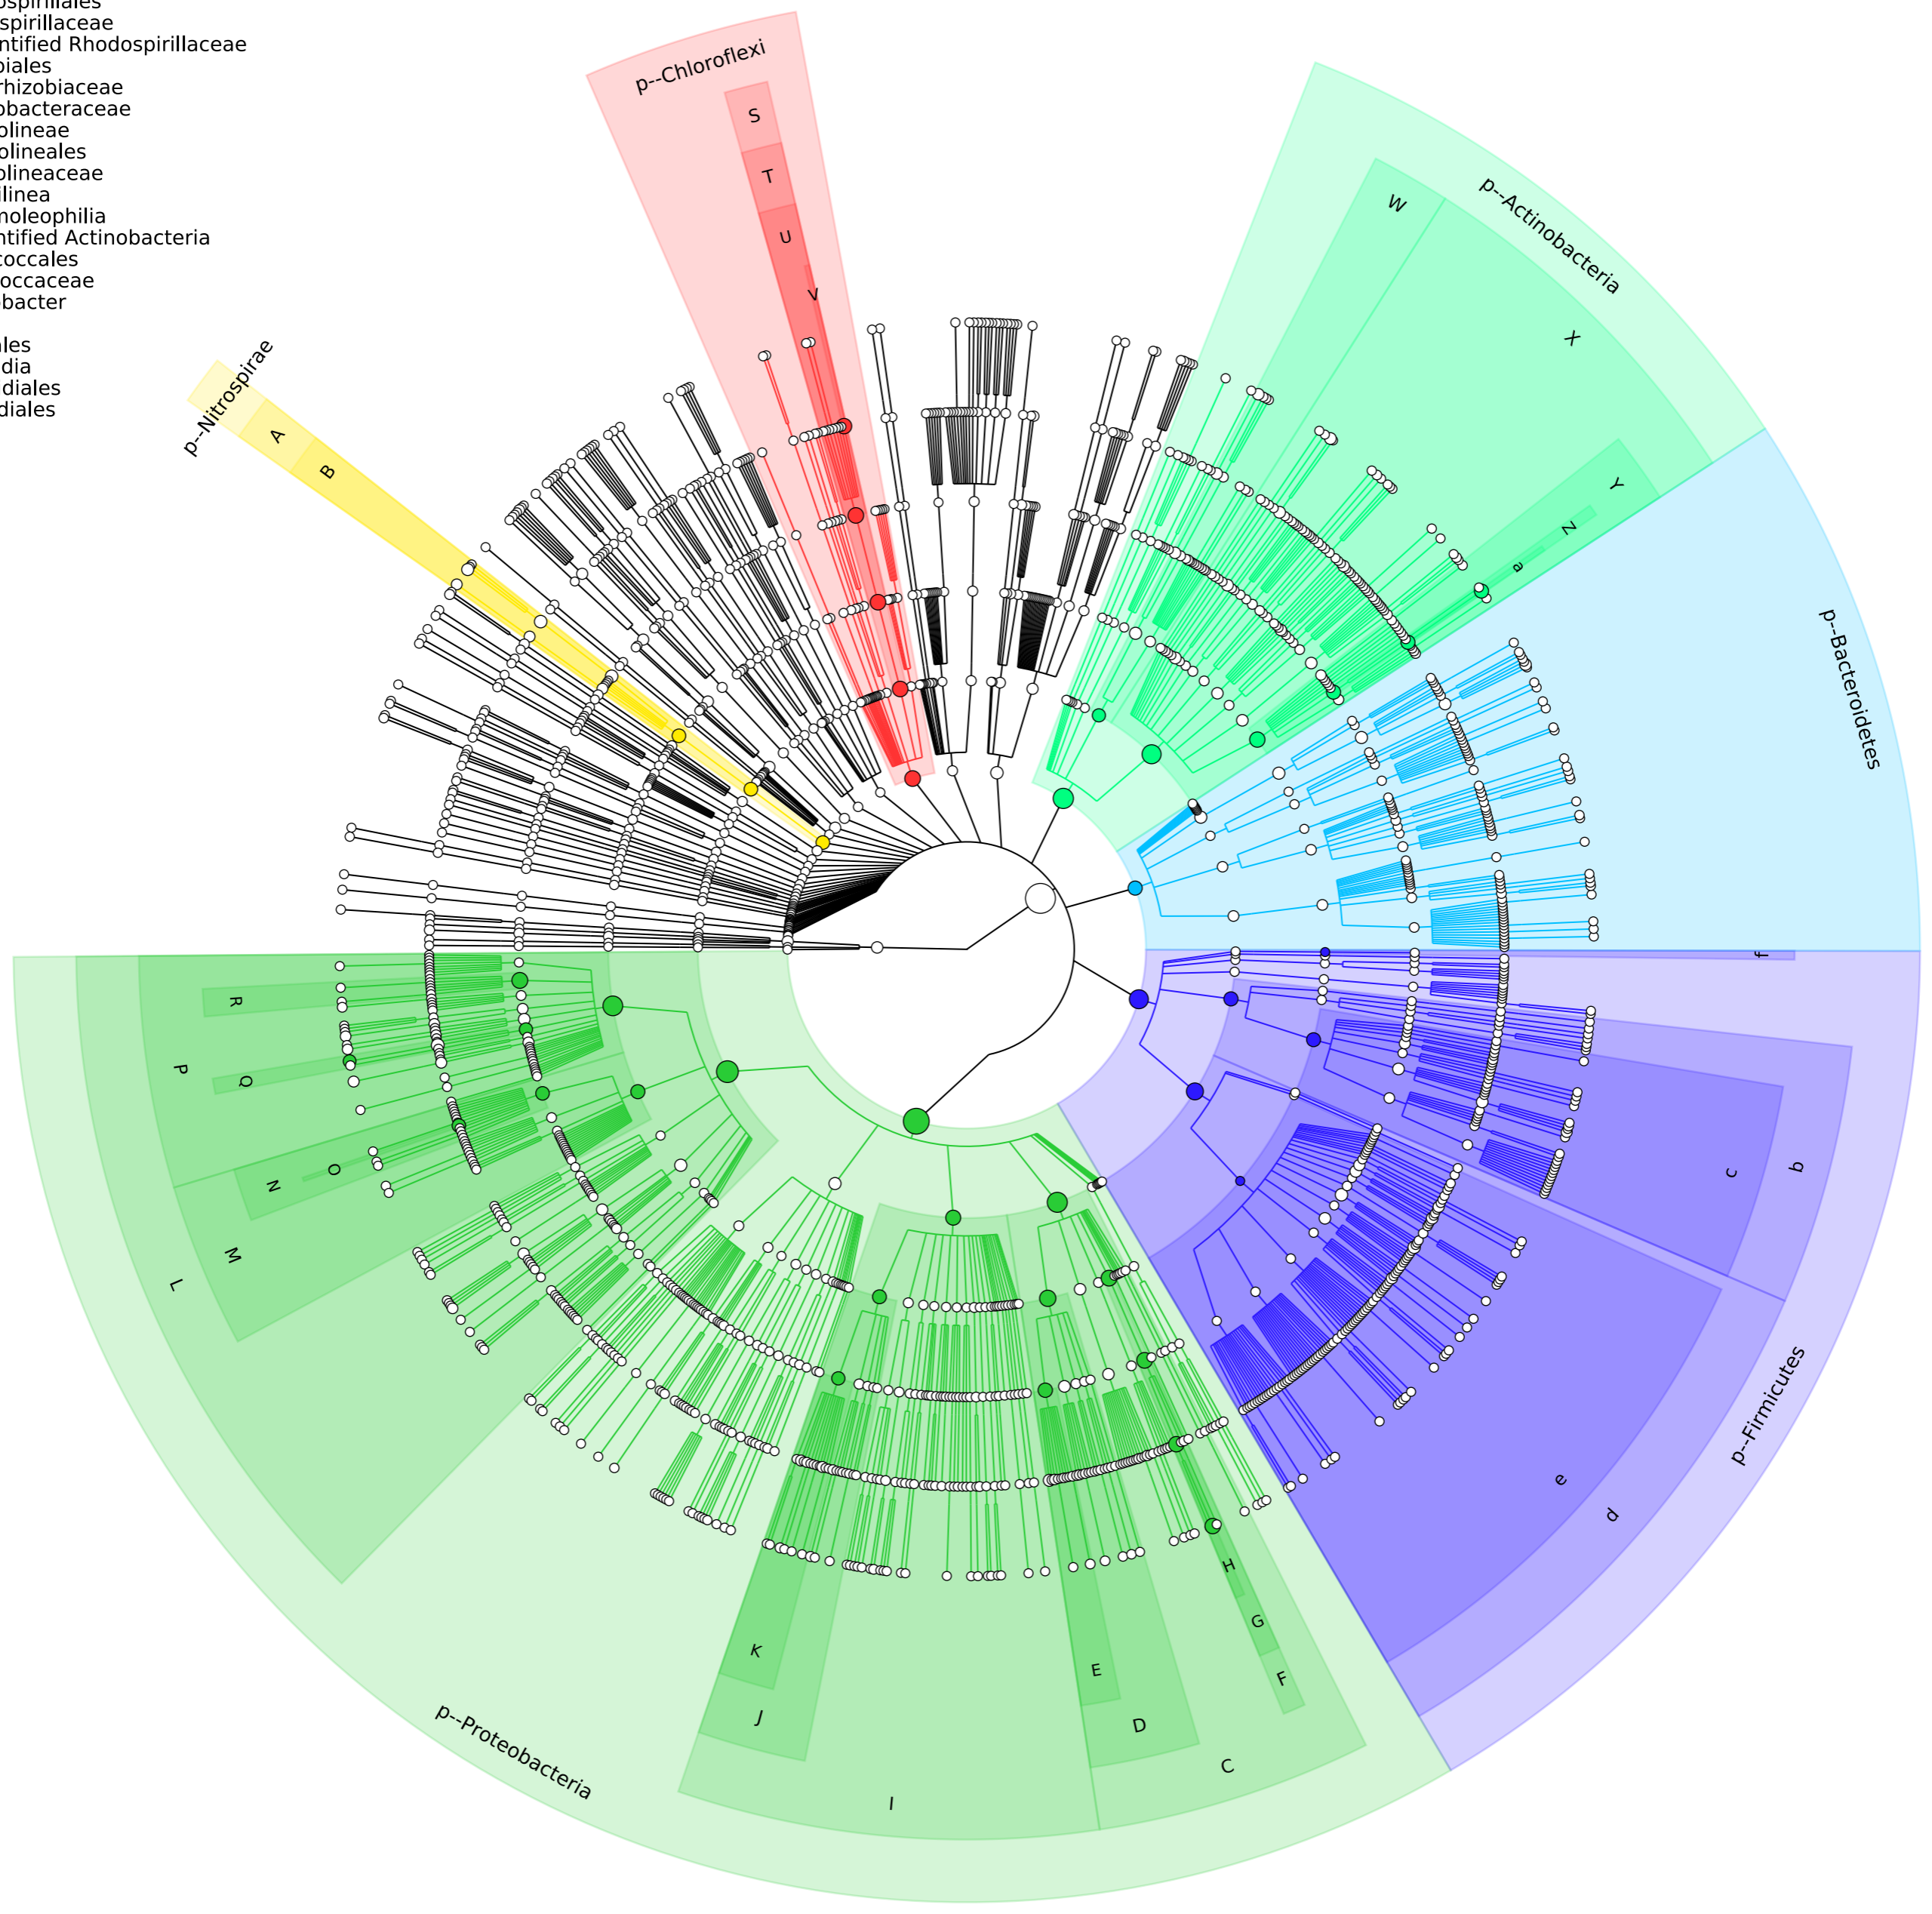

Supplement: peerj-06-5741-s007.pdf [file peerj-06-5741-s007.pdf]
