# Supplementary material for: Effects of wine-cap Stropharia cultivation on soil nutrients and bacterial communities in forestlands of northern China
Source: PubMed Central journal article supplement (PMC6183509; doi:10.7717/peerj.5741), 2018-10-09
Supplement: peerj-06-5741-s008.pdf [file peerj-06-5741-s008.pdf]

- P--ACTINOBACTERIA
- P--BACTEROIDETES
- P--FIRMICUTES
- P--NITROSPIRAE
- P--PROTEOBACTERIA

- A:c--Nitrospira
- B:o--Nitrospirales
- C:f--Nitrospiraceae
- D:g--unidentified Nitrospiraceae
- E:c--Betaproteobacteria
- F:o--Burkholderiales
- G:f--Comamonadaceae
- H:o--Nitrosomonadales
- I:f--Nitrosomonadaceae
- J:g--unidentified Nitrosomonadaceae
- K:o--Rhodocyclales
- L:f--Rhodocyclaceae
- M:g--Dechloromonas
- N:c--Gammaproteobacteria
- O:o--Thiotrichales
- P:f--Piscirickettsiaceae
- Q:g--Methylophaga
- R:o--Xanthomonadales
- S:f--Xanthomonadaceae
- T:c--Alphaproteobacteria
- U:o--Sphingomonadales
- V:f--Sphingomonadaceae
- W:o--Rhodospirillales
- X:f--Rhodospirillaceae
- Y:g--unidentified Rhodospirillaceae
- Z:o--Rhizobiales
- a:f--Bradyrhizobiaceae
- b:g--Bradyrhizobium
- c:f--Xanthobacteraceae
- d:c--unidentified Actinobacteria
- e:o--Micrococcales
- f:c--Clostridia
- g:o--Clostridiales
- h:o--Clostridiales

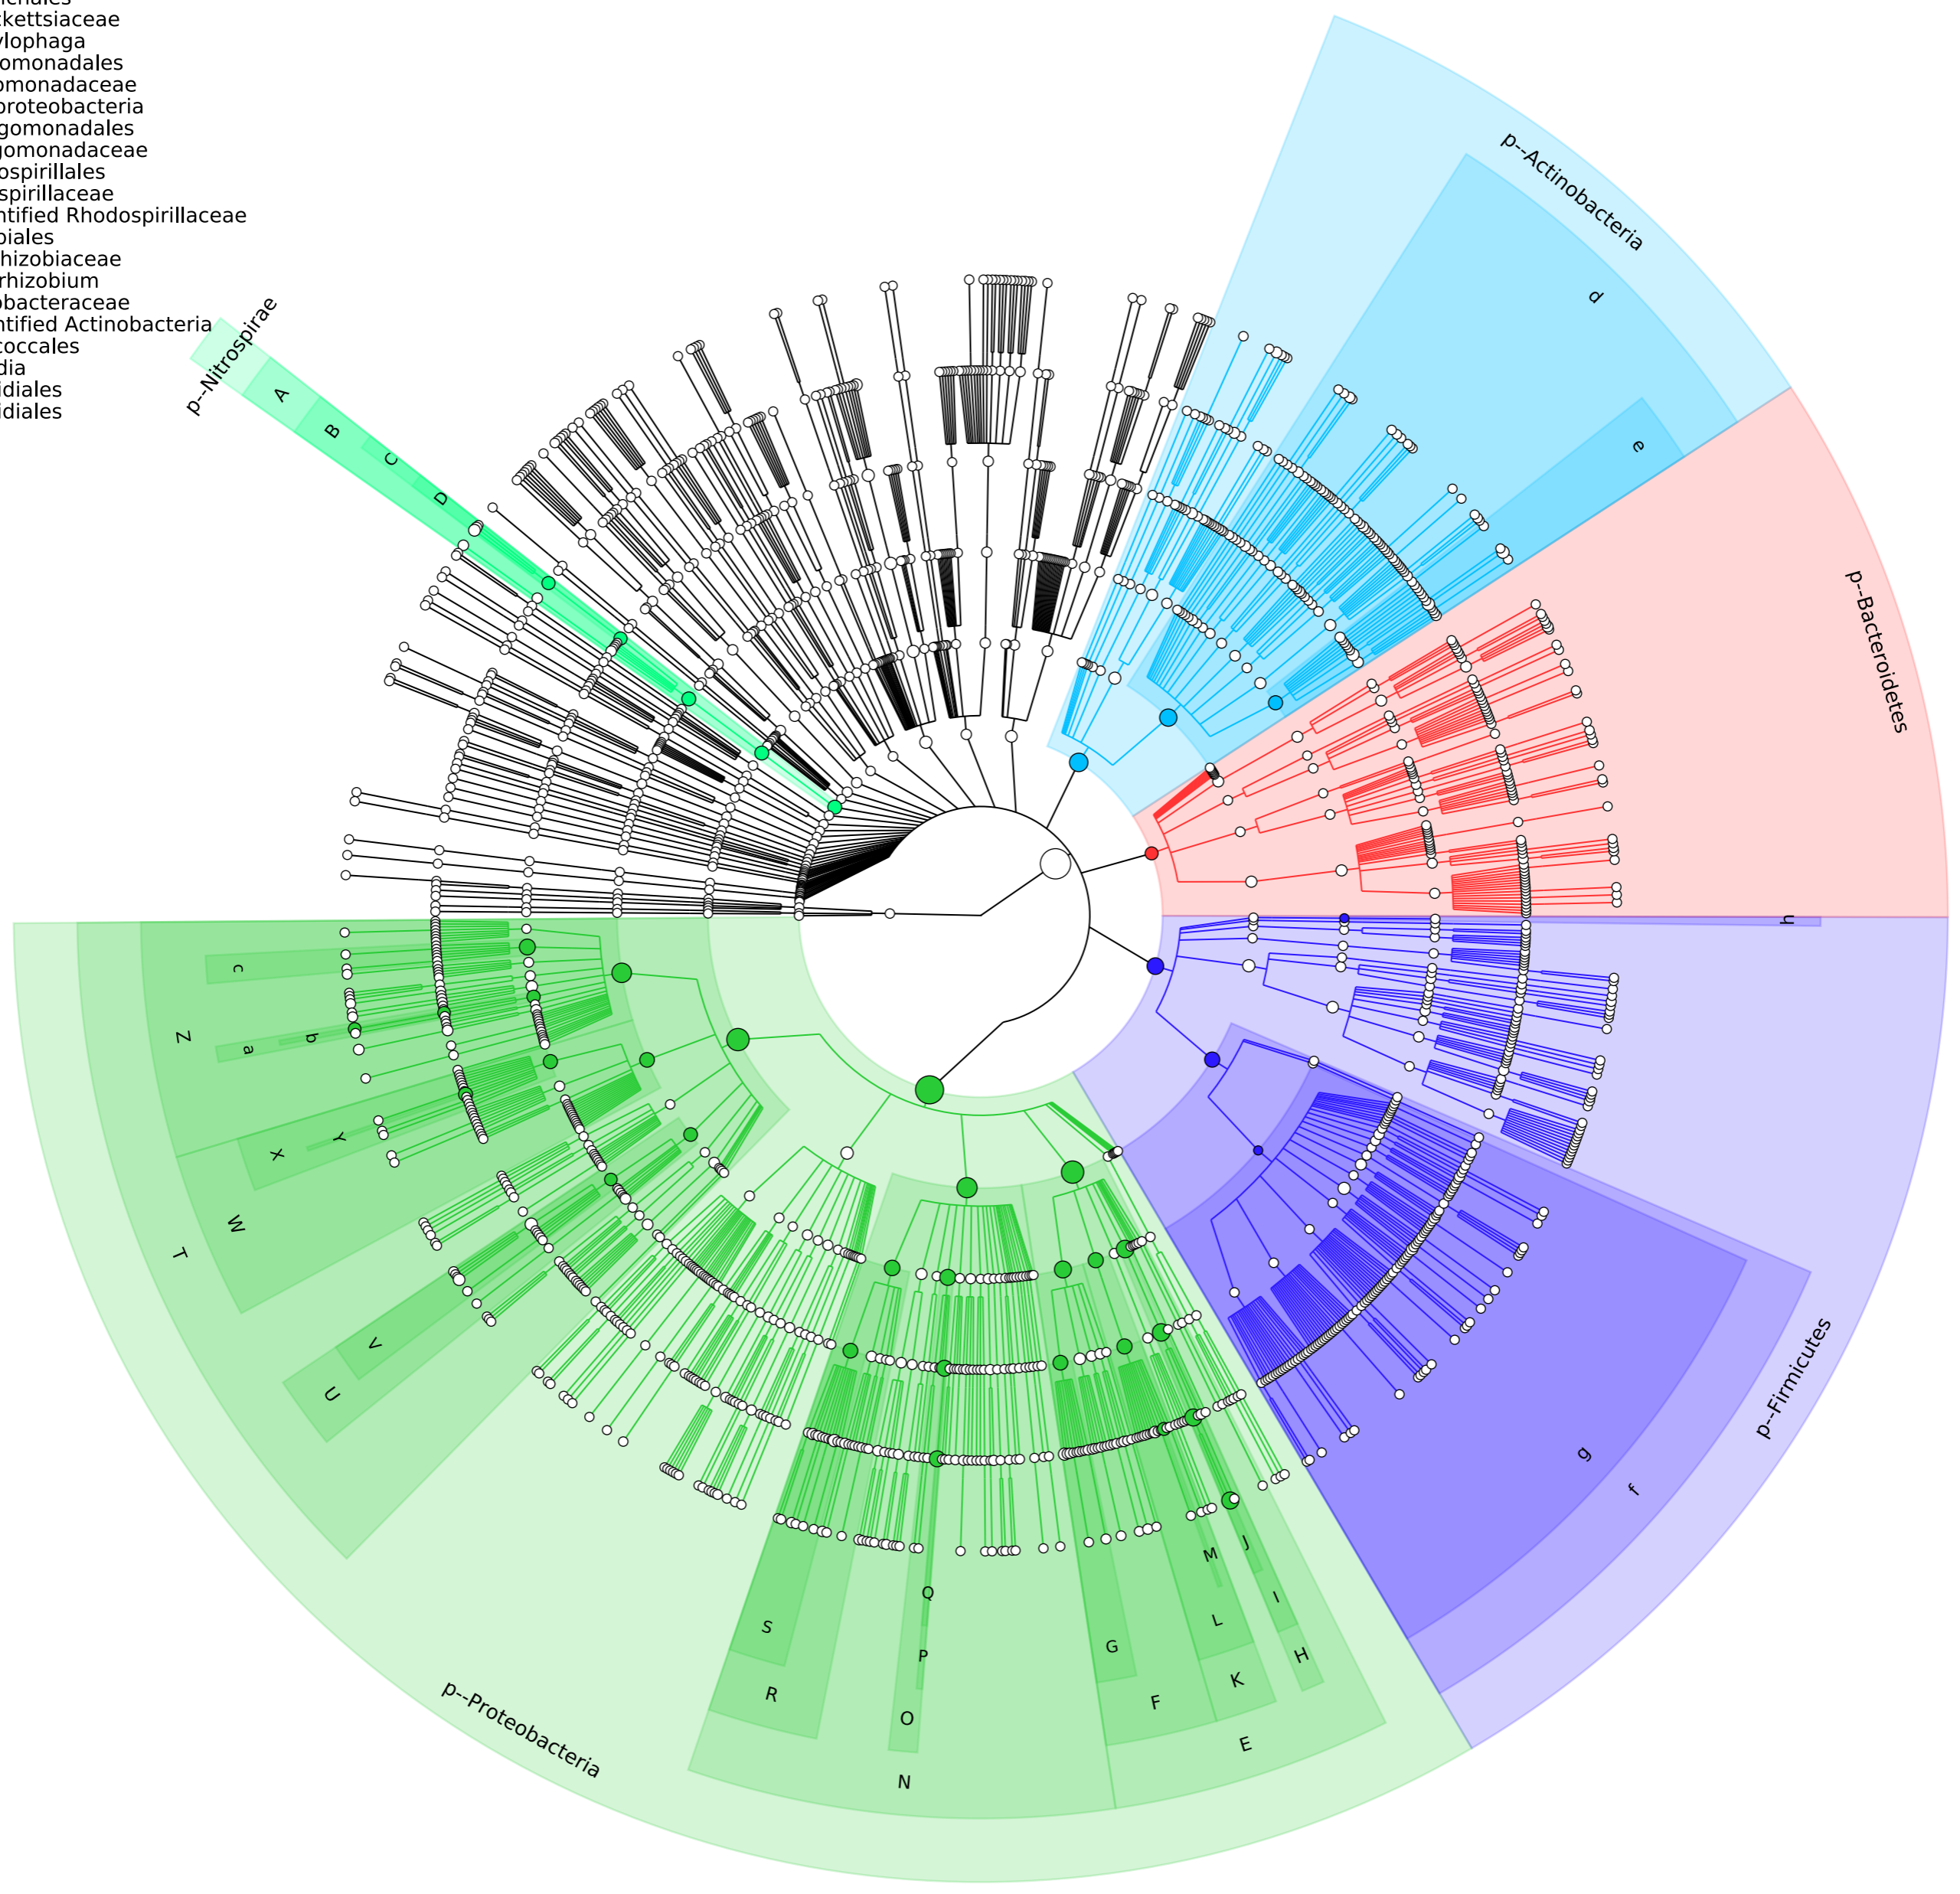

p--Nitrospirae

p--Actinobacteria

p--Bacteroidetes

p--Firmicutes

p--Proteobacteria

Z

T

W

U

V

a

b

X

Y

A

B

C

D

N

O

P

R

S

F

G

O

P

R

S

K

L

M

J

I

H

g

f

d

e

h
