# Supplementary material for: Effects of wine-cap Stropharia cultivation on soil nutrients and bacterial communities in forestlands of northern China
Source: PubMed Central journal article supplement (PMC6183509; doi:10.7717/peerj.5741), 2018-10-09

A:c--Flavobacteria  
 B:o--Flavobacteriales  
 C:f--Flavobacteriaceae  
 D:g--Chryseobacterium  
 E:c--Nitrospira  
 F:o--Nitrospirales  
 G:f--Nitrospiraceae  
 H:g--unidentified Nitrospiraceae  
 I:c--Betaproteobacteria  
 J:o--Burkholderiales  
 K:f--Comamonadaceae  
 L:f--Burkholderiaceae  
 M:o--Nitrosomonadales  
 N:f--Nitrosomonadaceae  
 O:g--unidentified Nitrosomonadaceae  
 P:c--Gammaproteobacteria  
 Q:o--Aeromonadales  
 R:f--Aeromonadaceae  
 S:g--Aeromonas  
 T:o--Xanthomonadales  
 U:f--Xanthomonadaceae  
 V:c--Alphaproteobacteria  
 W:o--Sphingomonadales  
 X:o--Rhodospirillales  
 Y:f--Rhodospirillaceae  
 Z:g--unidentified Rhodospirillaceae  
 a:o--Rhizobiales  
 b:f--Bradyrhizobiaceae  
 c:f--Xanthobacteraceae  
 d:c--unidentified Actinobacteria  
 e:o--Micrococcales  
 f:f--Micrococcaceae  
 g:g--Arthrobacter

● P--ACTINOBACTERIA  
 ● P--BACTEROIDETES  
 ● P--FIRMICUTES  
 ● P--NITROSPIRAE  
 ● P--PROTEOBACTERIA

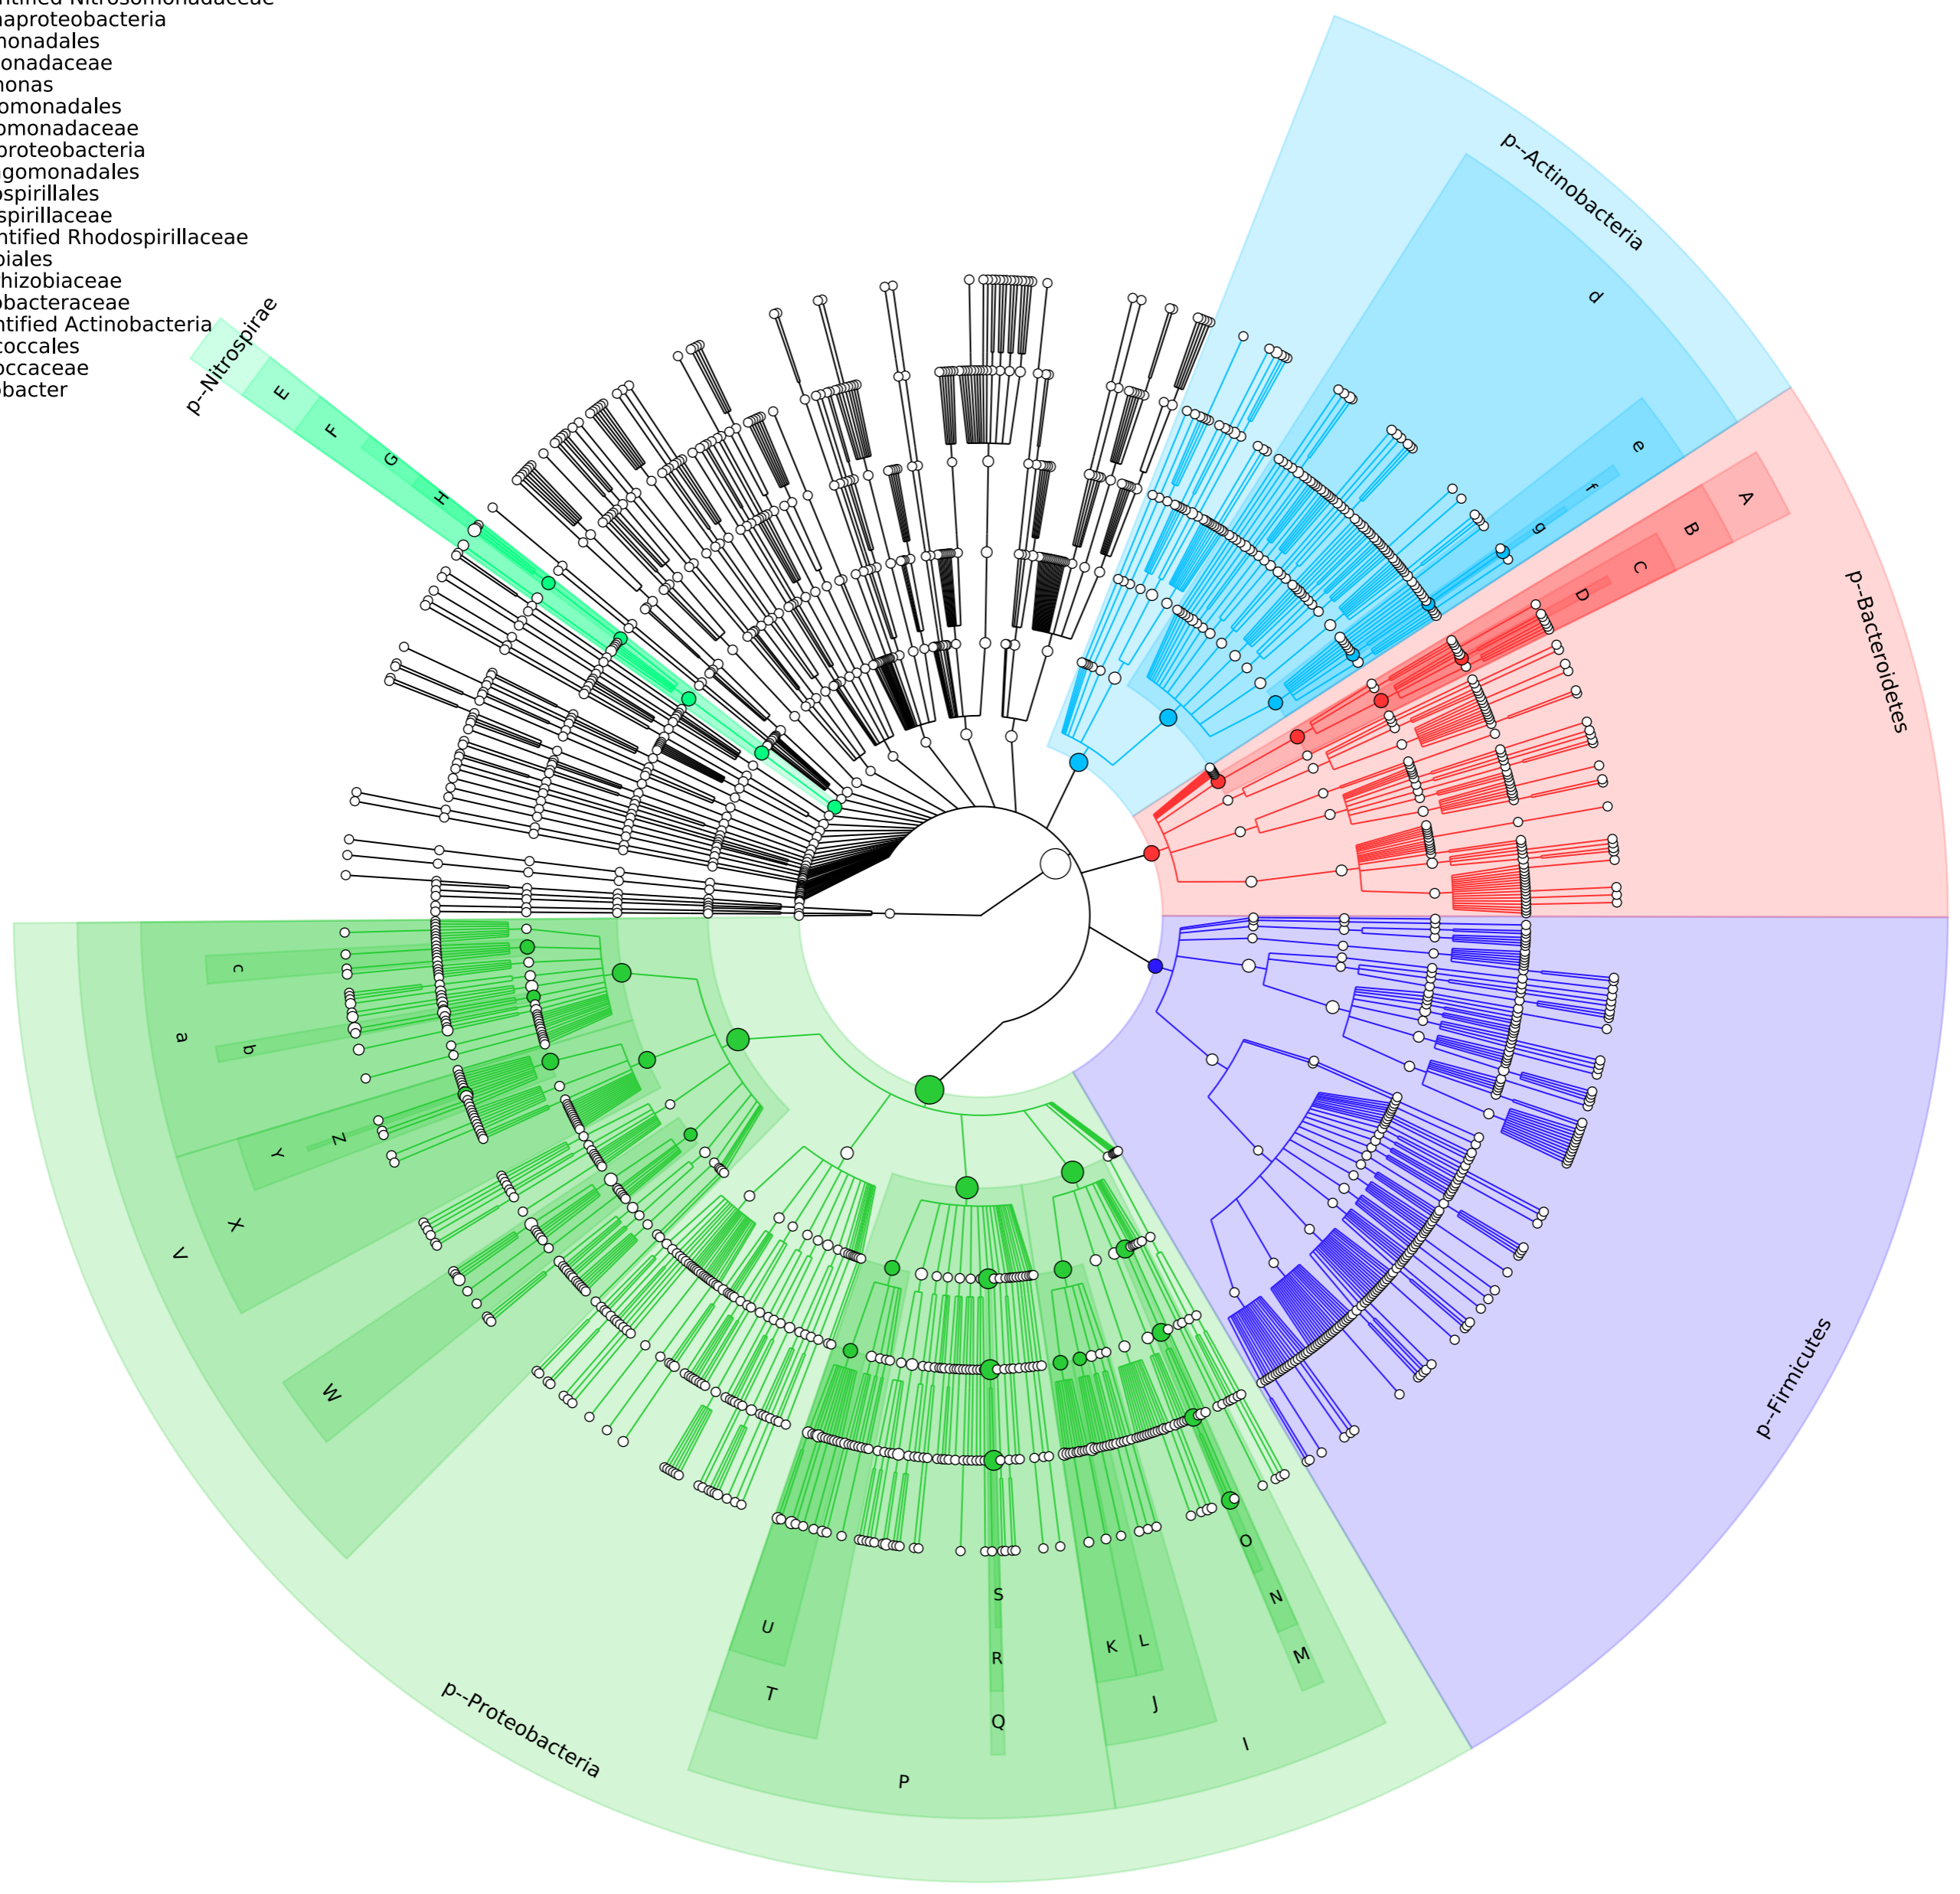

Supplement: peerj-06-5741-s010.pdf [file peerj-06-5741-s010.pdf]
