# Supplementary material for: Effects of wine-cap Stropharia cultivation on soil nutrients and bacterial communities in forestlands of northern China
Source: PubMed Central journal article supplement (PMC6183509; doi:10.7717/peerj.5741), 2018-10-09

- P--ACTINOBACTERIA
- P--FIRMICUTES
- P--NITROSPIRAE
- P--PROTEOBACTERIA

- A:c--Nitrospira
- B:o--Nitrospirales
- C:f--Nitrospiraceae
- D:g--unidentified Nitrospiraceae
- E:c--Deltaproteobacteria
- F:c--Betaproteobacteria
- G:o--Burkholderiales
- H:f--Comamonadaceae
- I:g--Piscinibacter
- J:o--Nitrosomonadales
- K:f--Nitrosomonadaceae
- L:g--unidentified Nitrosomonadaceae
- M:o--Rhodocyclales
- N:f--Rhodocyclaceae
- O:g--Dechloromonas
- P:c--Gammaproteobacteria
- Q:o--Xanthomonadales
- R:c--Alphaproteobacteria
- S:o--Rhodospirillales
- T:f--Rhodospirillaceae
- U:g--unidentified Rhodospirillaceae
- V:o--Rhizobiales
- W:f--Bradyrhizobiaceae
- X:g--Bradyrhizobium
- Y:f--Xanthobacteraceae
- Z:c--unidentified Actinobacteria
- a:o--Micrococcales
- b:f--Micrococcaceae
- c:g--Arthrobacter
- d:c--Bacilli
- e:o--Bacillales
- f:c--Clostridia
- g:o--Clostridiales
- h:o--Clostridiales

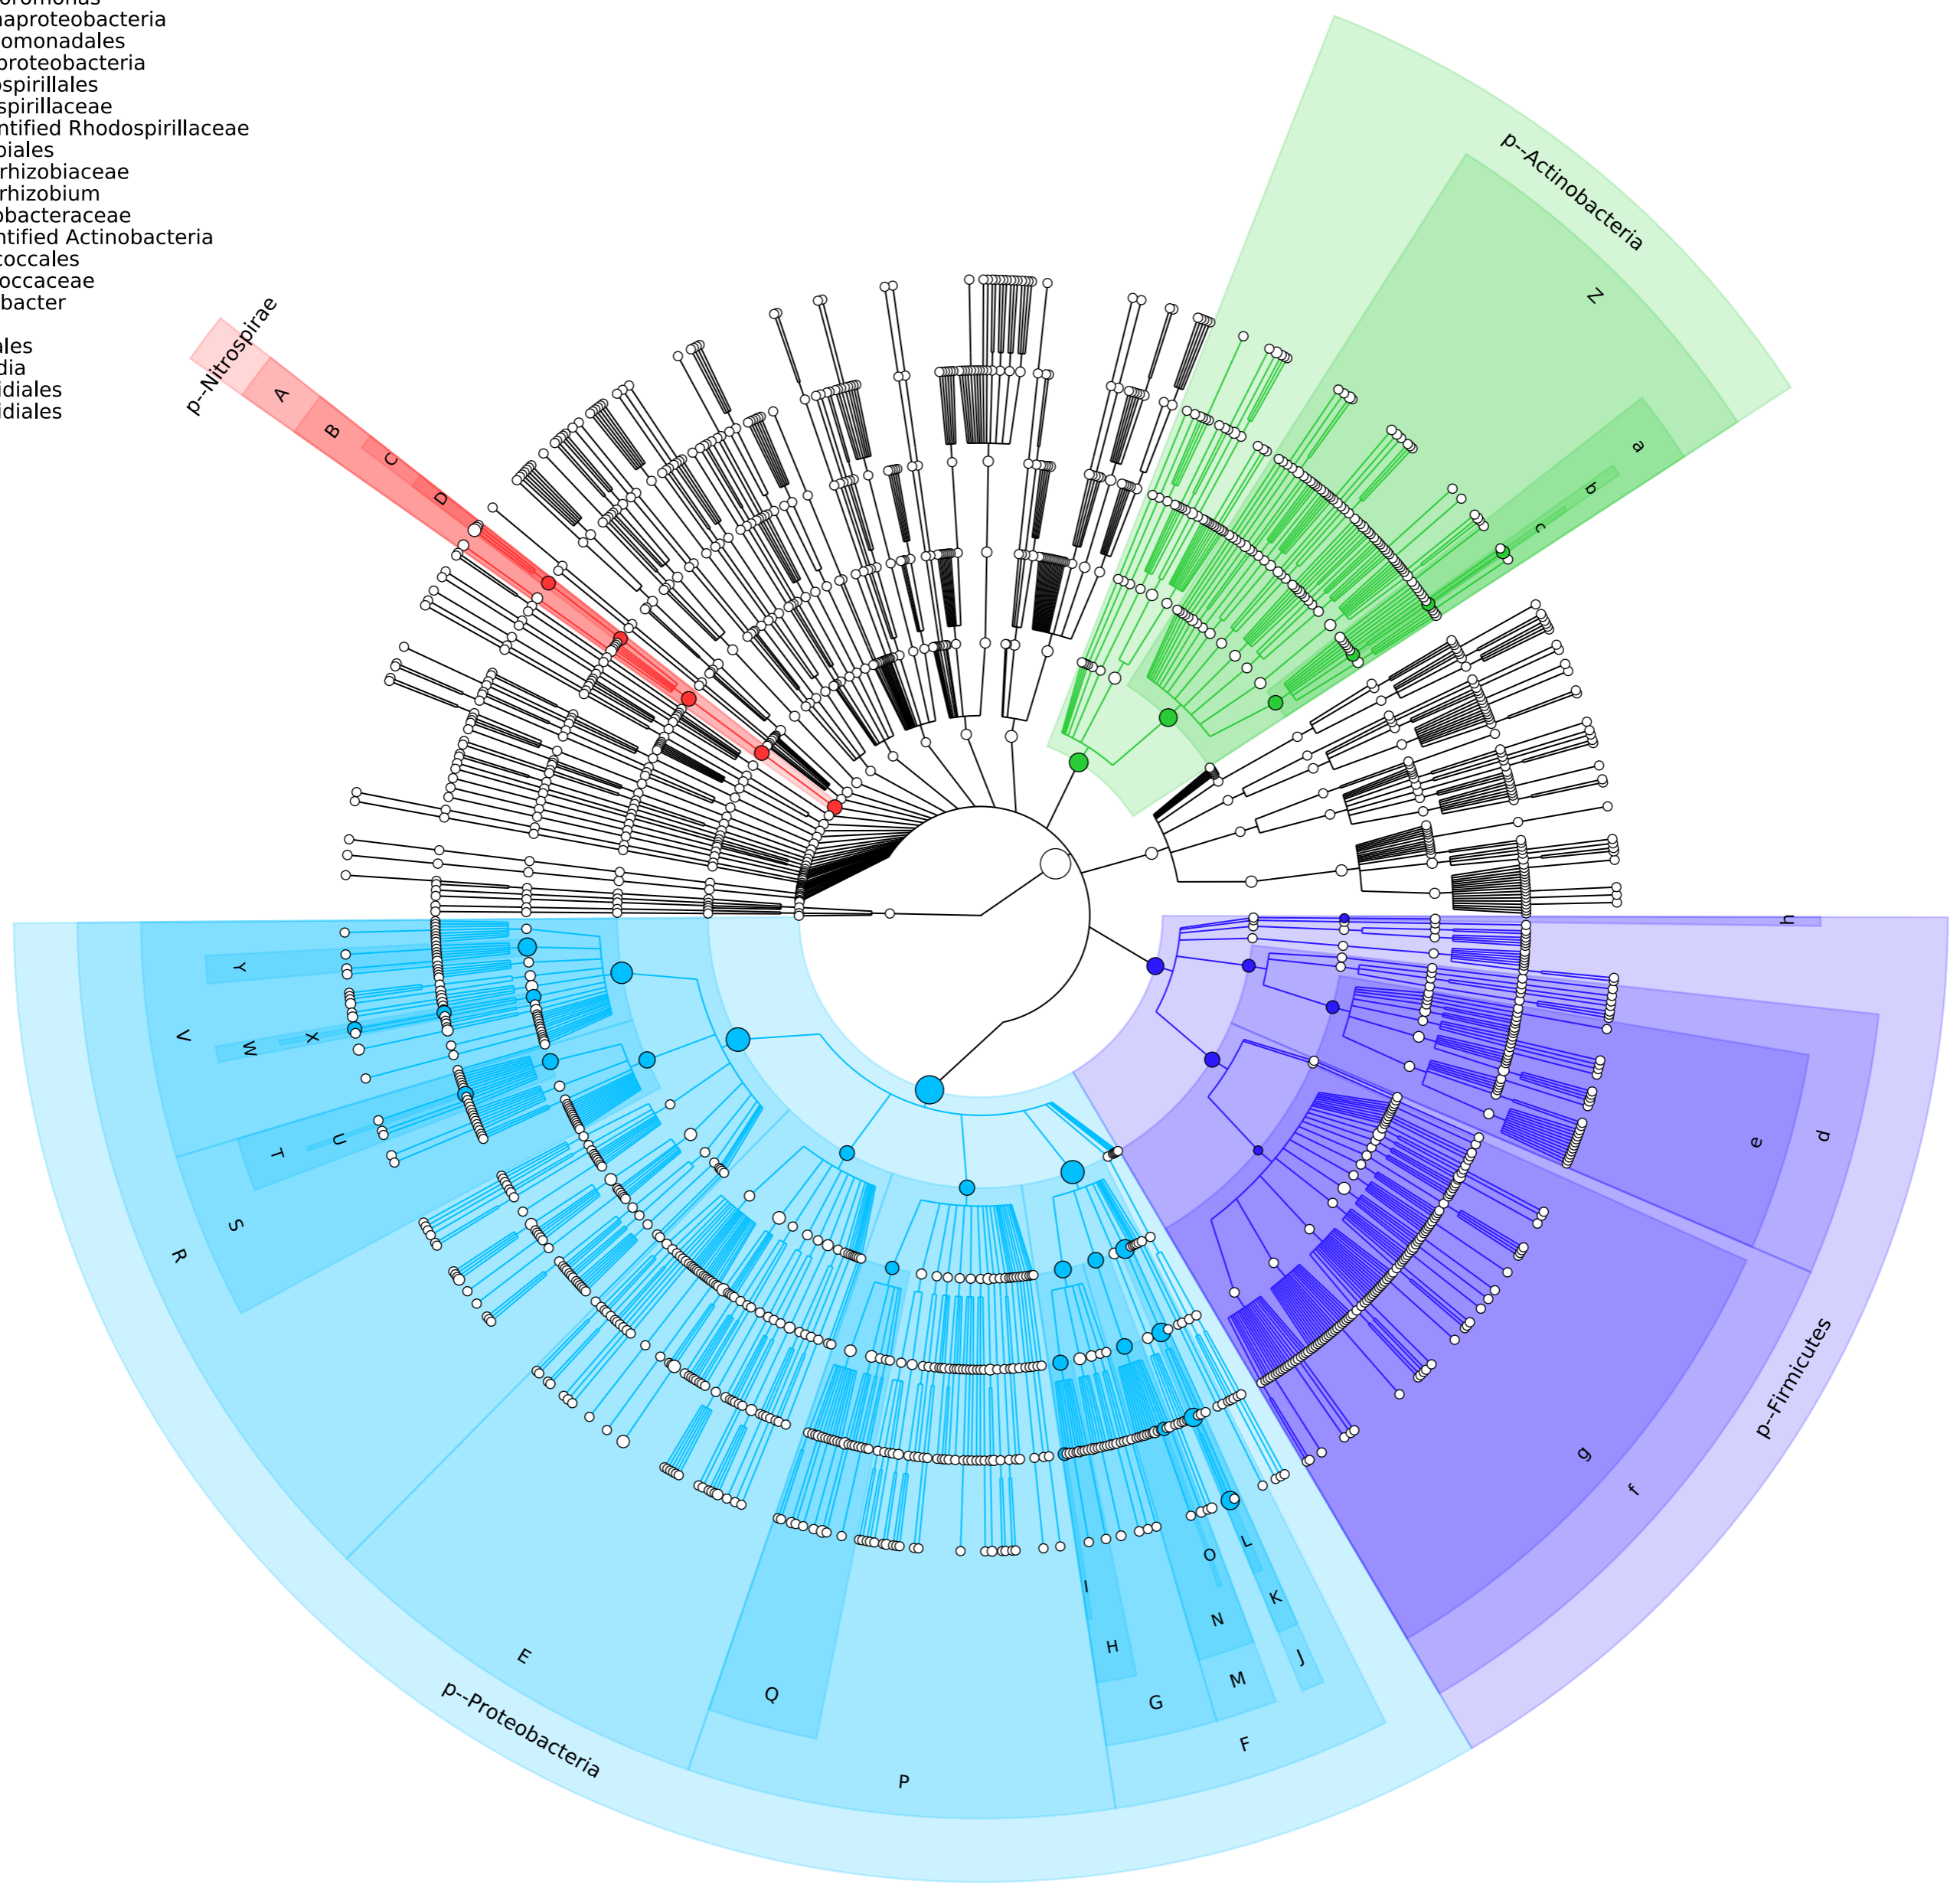

Supplement: peerj-06-5741-s011.pdf [file peerj-06-5741-s011.pdf]
