# Supplementary material for: Effects of wine-cap Stropharia cultivation on soil nutrients and bacterial communities in forestlands of northern China
Source: PubMed Central journal article supplement (PMC6183509; doi:10.7717/peerj.5741), 2018-10-09

- A:c--Nitrospira
- B:o--Nitrospirales
- C:f--Nitrospiraceae
- D:g--unidentified Nitrospiraceae
- E:c--Betaproteobacteria
- F:o--Burkholderiales
- G:f--Comamonadaceae
- H:f--Burkholderiaceae
- I:o--Nitrosomonadales
- J:f--Nitrosomonadaceae
- K:g--unidentified Nitrosomonadaceae
- L:c--Gammaproteobacteria
- M:o--Xanthomonadales
- N:c--Alphaproteobacteria
- O:o--Rhodospirillales
- P:f--Rhodospirillaceae
- Q:g--unidentified Rhodospirillaceae
- R:o--Rhizobiales
- S:f--Bradyrhizobiaceae
- T:g--Bradyrhizobium
- U:f--Rhizobiaceae
- V:f--Xanthobacteraceae
- W:c--Thermoleophilia
- X:o--Gaiellales
- Y:c--unidentified Actinobacteria
- Z:o--Micromonosporales
- a:f--Micromonosporaceae
- b:o--Micrococcales
- c:f--Micrococcaceae
- d:g--Arthrobacter
- e:c--Bacilli
- f:o--Bacillales

- P--ACTINOBACTERIA
- P--FIRMICUTES
- P--NITROSPIRAE
- P--PROTEOBACTERIA

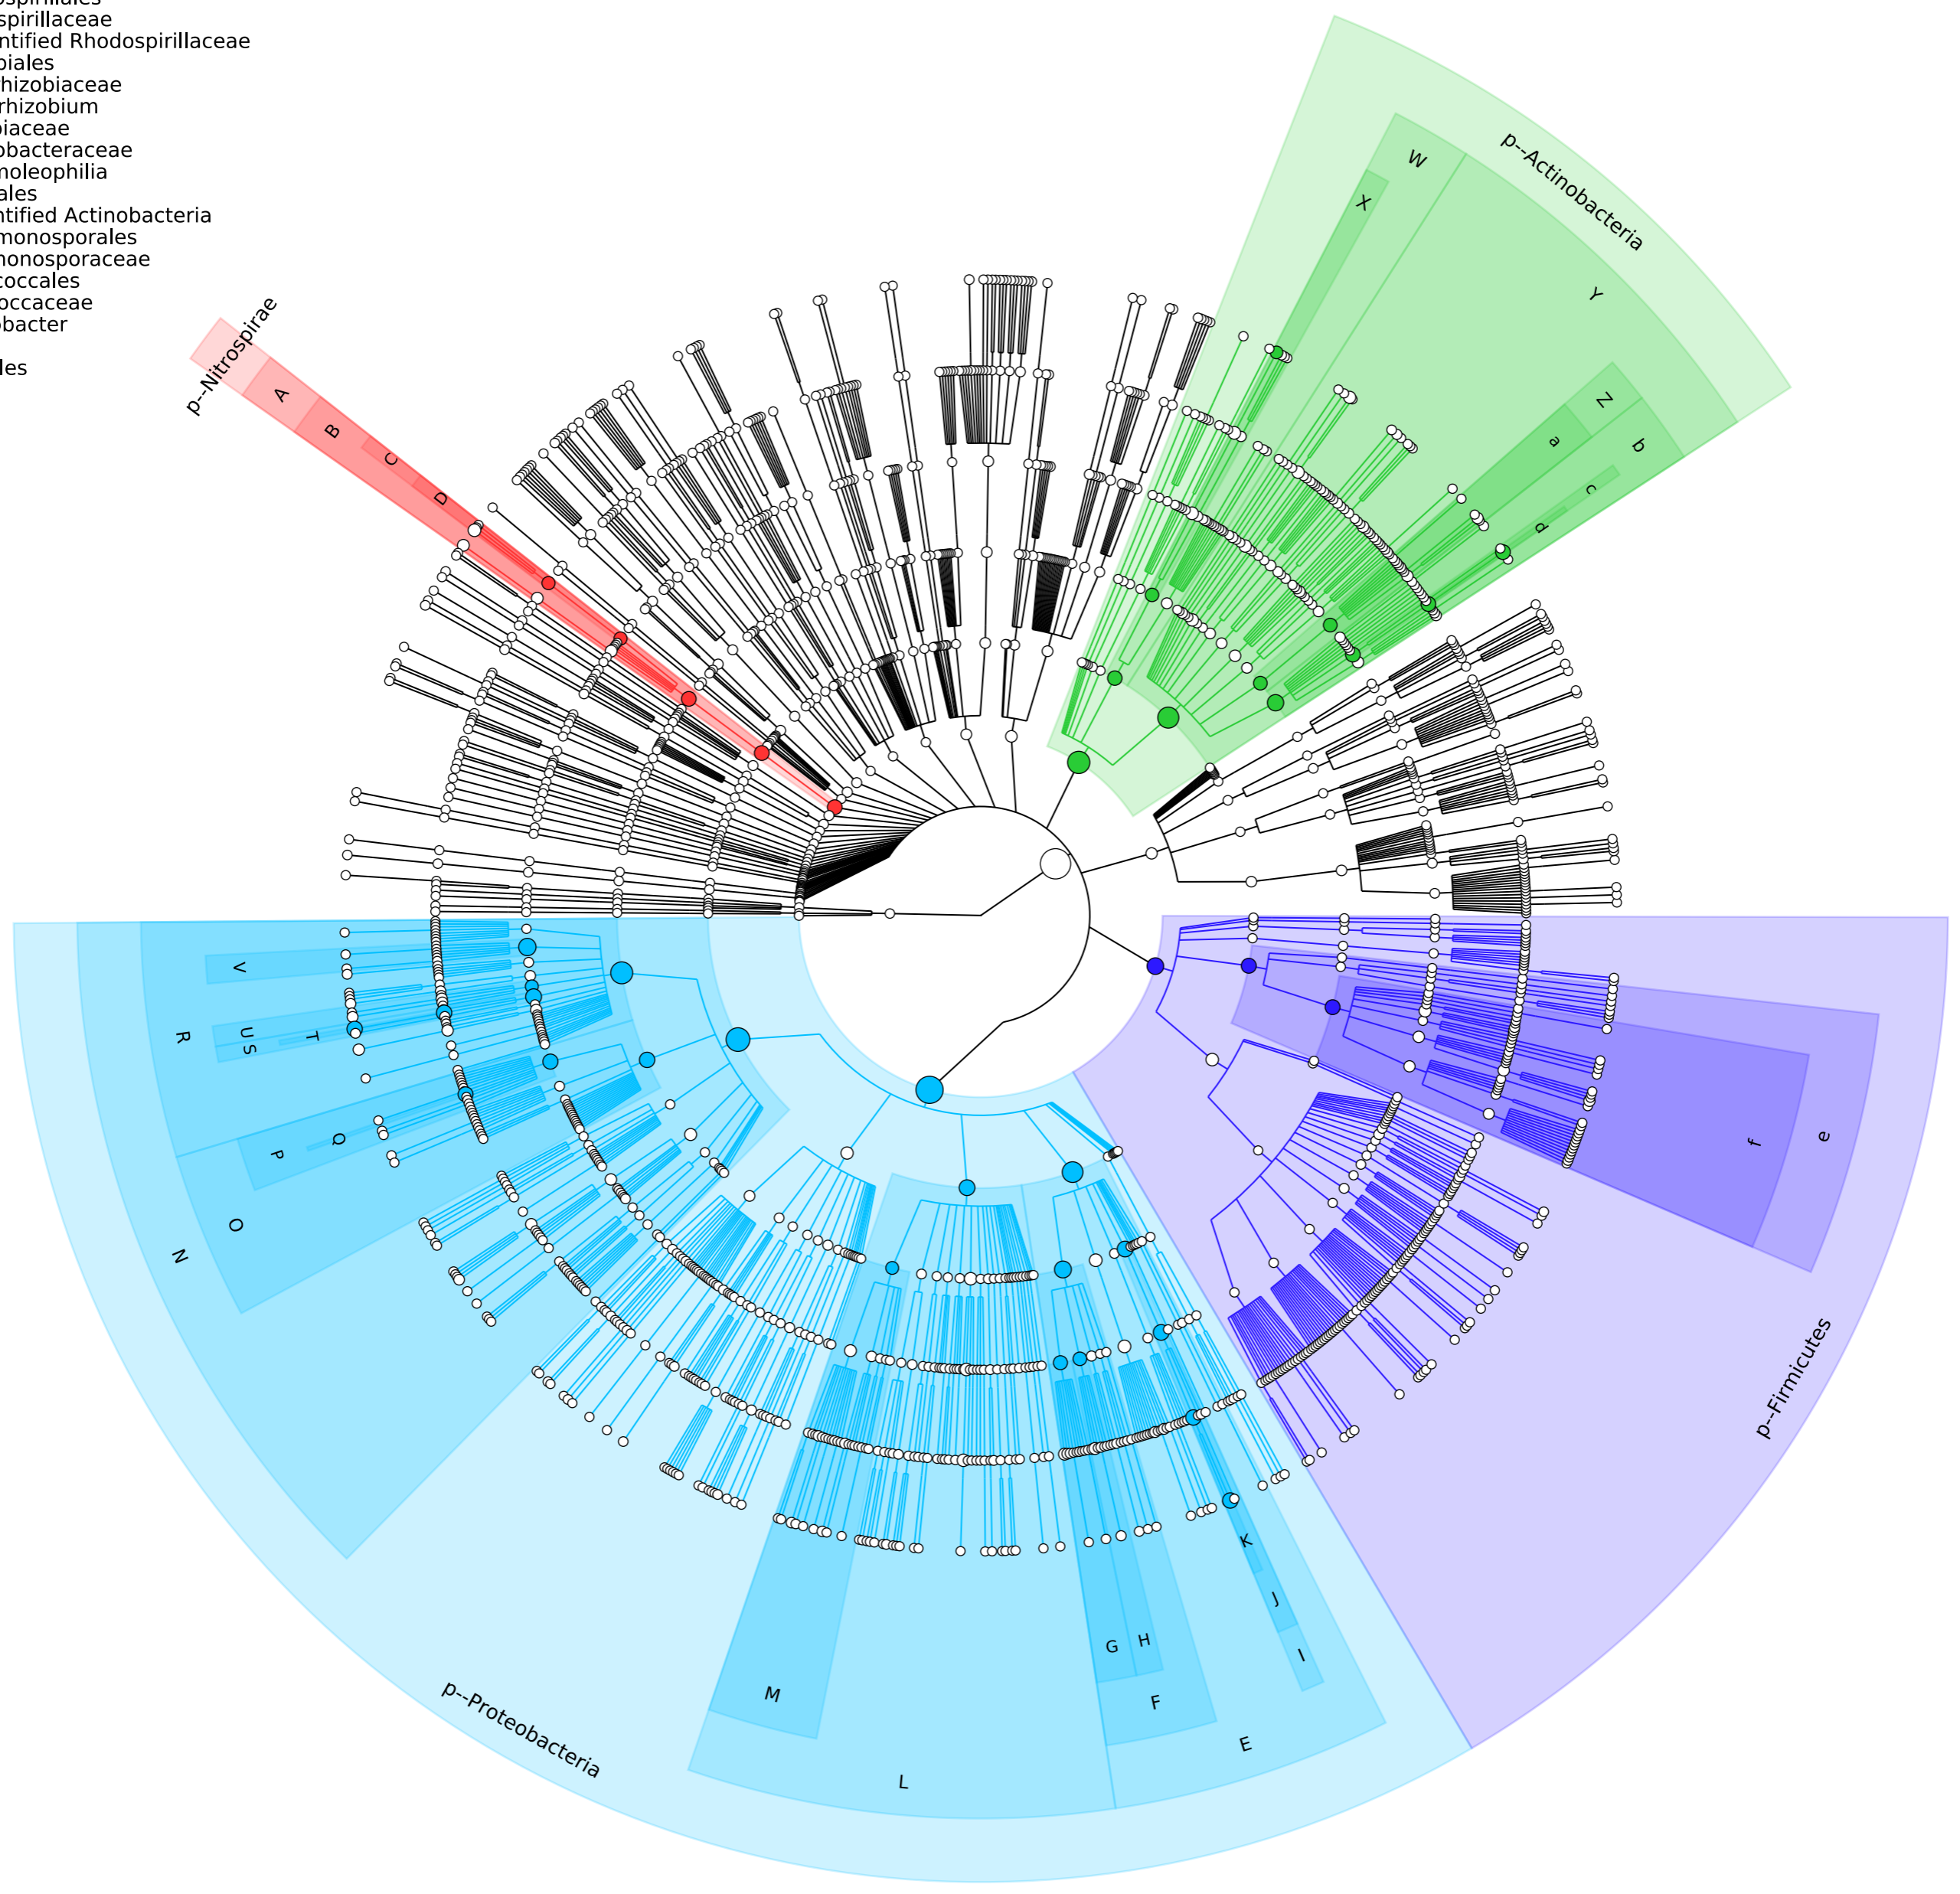

Supplement: peerj-06-5741-s013.pdf [file peerj-06-5741-s013.pdf]
