# Supplementary material for: Effects of wine-cap Stropharia cultivation on soil nutrients and bacterial communities in forestlands of northern China
Source: PubMed Central journal article supplement (PMC6183509; doi:10.7717/peerj.5741), 2018-10-09

- A:c--Nitospira
- B:o--Nitrospirales
- C:f--Nitrospiraceae
- D:g--unidentified Nitrospiraceae
- E:c--Deltaproteobacteria
- F:c--Betaproteobacteria
- G:o--Burkholderiales
- H:f--Comamonadaceae
- I:o--Nitrosomonadales
- J:f--Nitrosomonadaceae
- K:g--unidentified Nitrosomonadaceae
- L:c--Gammaproteobacteria
- M:o--Xanthomonadales
- N:f--Xanthomonadaceae
- O:c--Alphaproteobacteria
- P:o--Rhodospirillales
- Q:f--Rhodospirillaceae
- R:g--unidentified Rhodospirillaceae
- S:o--Rhizobiales
- T:f--Bradyrhizobiaceae
- U:g--Bradyrhizobium
- V:f--Xanthobacteraceae
- W:c--Thermoleophilia
- X:c--unidentified Actinobacteria
- Y:o--Micrococcales
- Z:f--Micrococcaceae
- a:g--Arthrobacter
- b:c--Bacilli
- c:o--Bacillales
- d:c--Clostridia
- e:o--Clostridiales
- f:o--Clostridiales

- P--ACTINOBACTERIA
- P--BACTEROIDETES
- P--FIRMICUTES
- P--NITROSPIRAE
- P--PROTEOBACTERIA

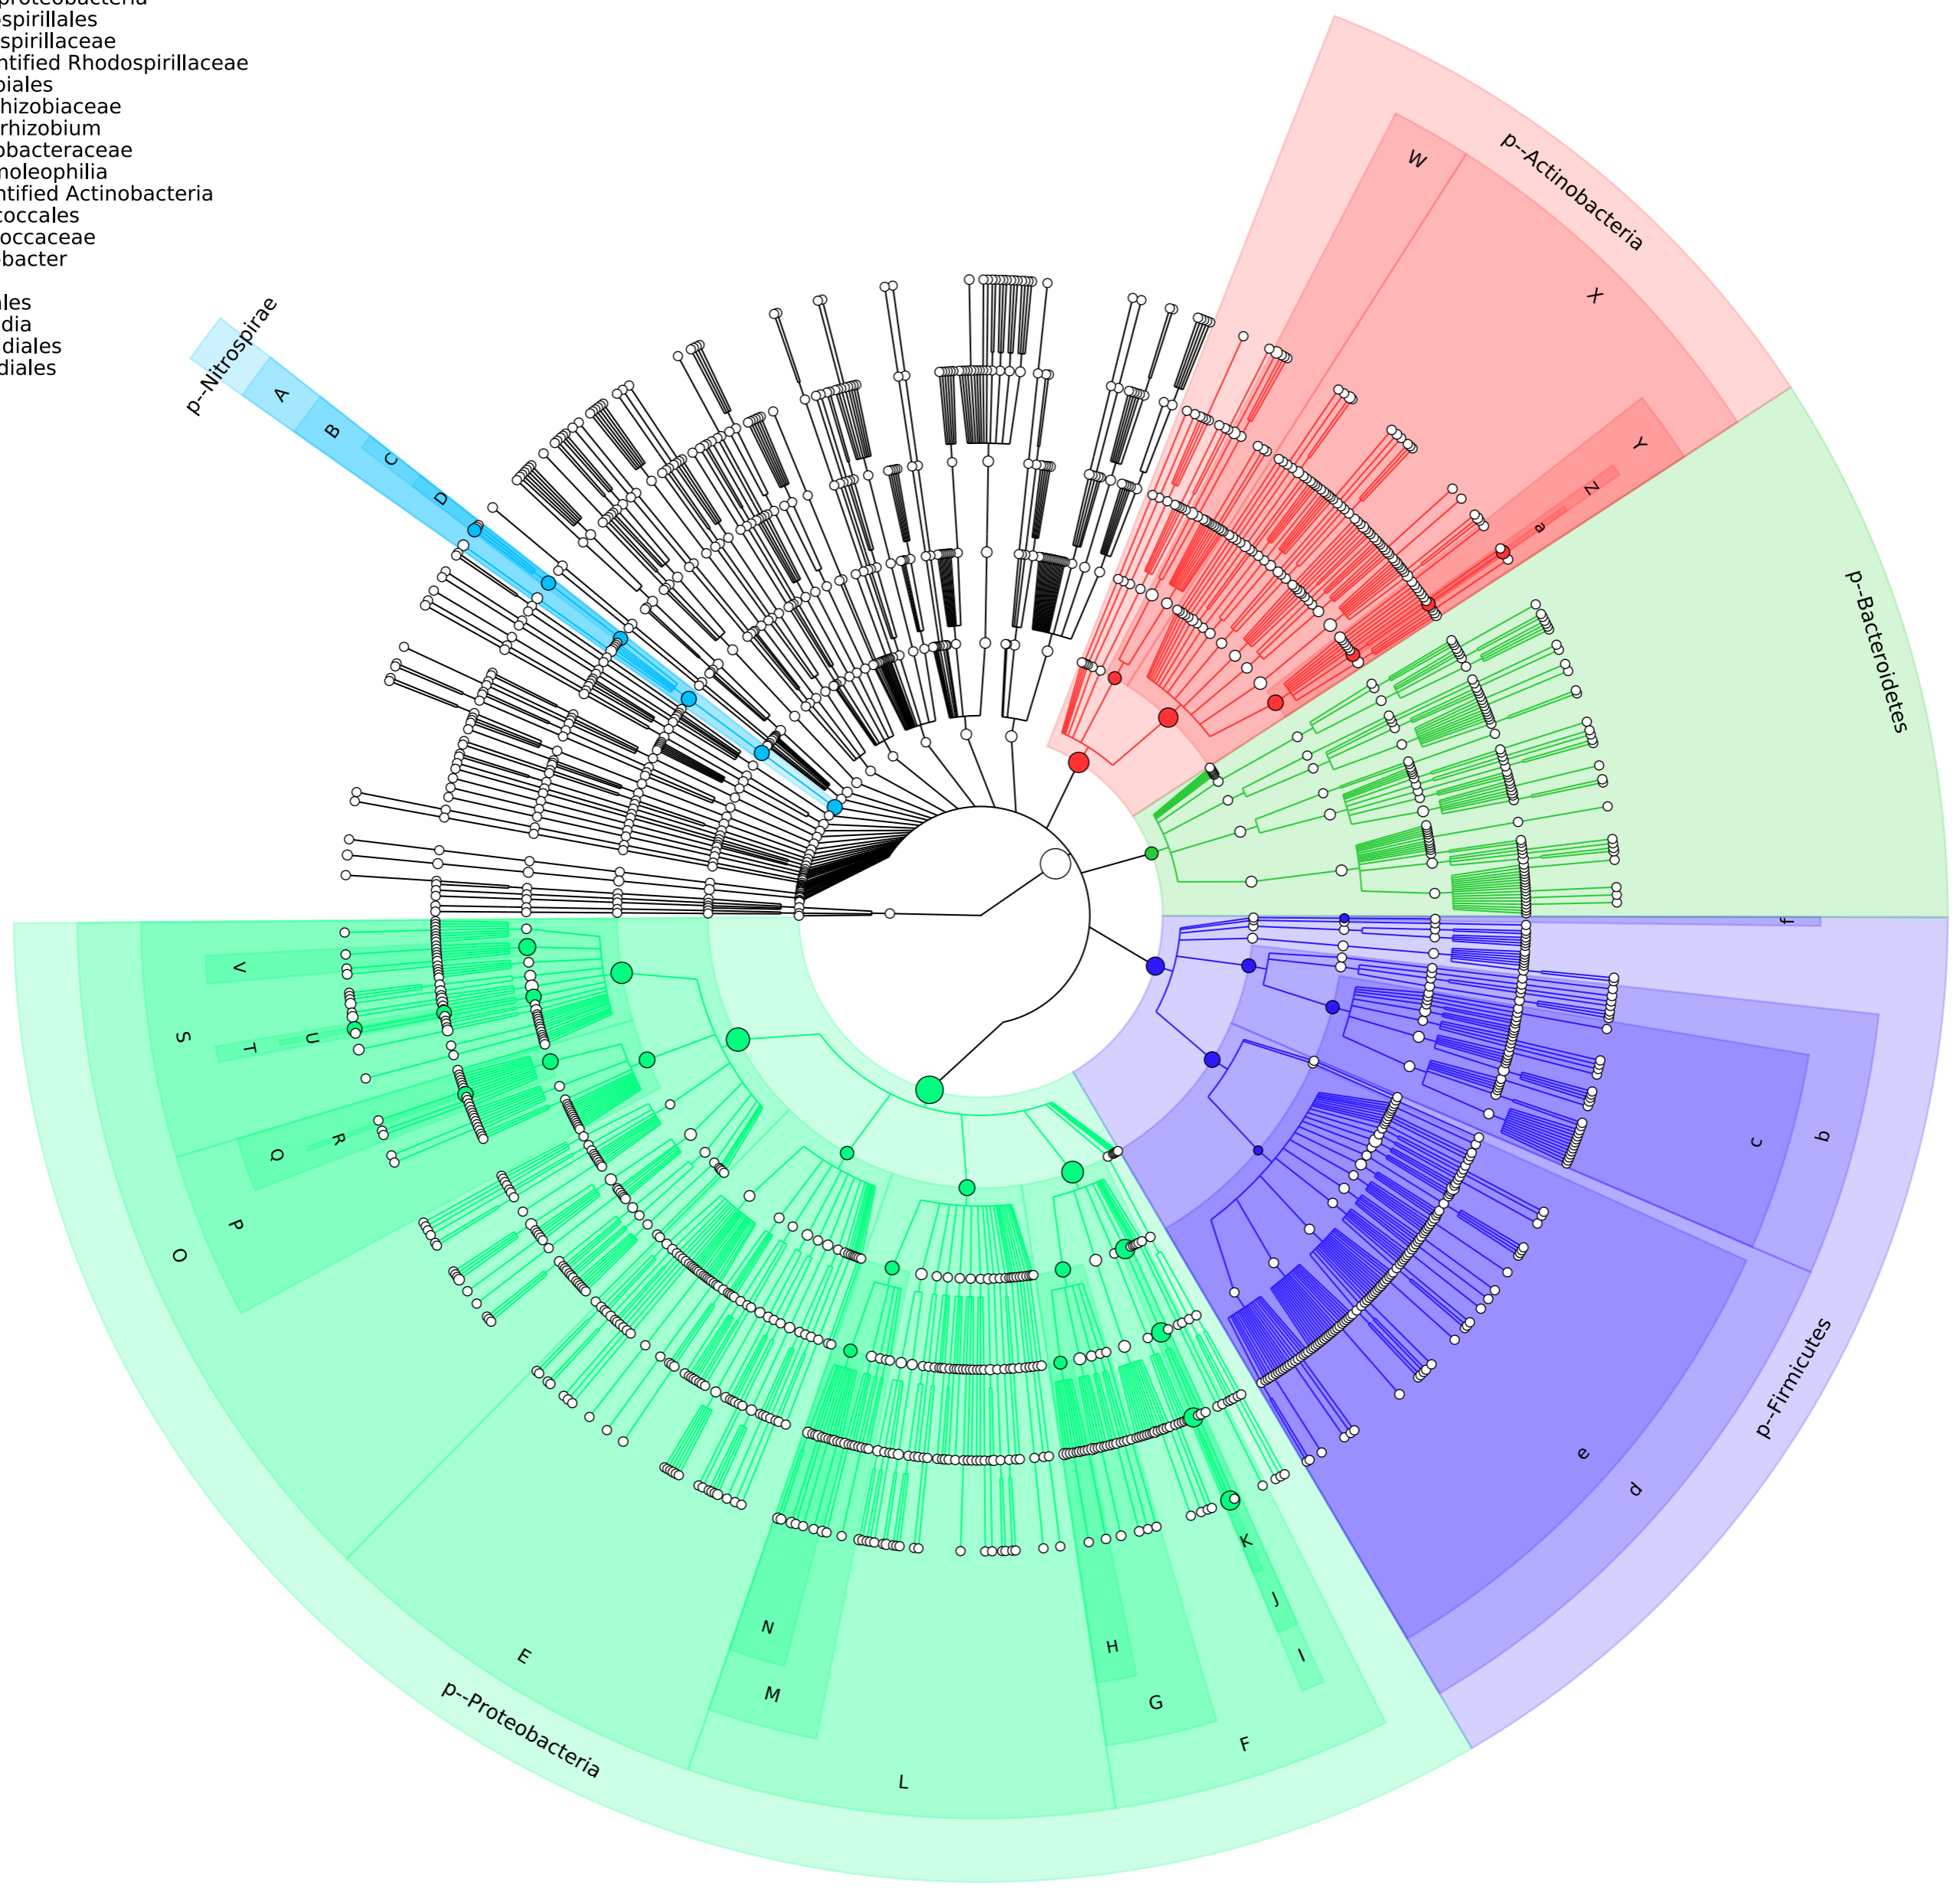

Supplement: peerj-06-5741-s014.pdf [file peerj-06-5741-s014.pdf]
