# Supplementary material for: Effects of wine-cap Stropharia cultivation on soil nutrients and bacterial communities in forestlands of northern China
Source: PubMed Central journal article supplement (PMC6183509; doi:10.7717/peerj.5741), 2018-10-09

A:c--Nitrospira  
 B:o--Nitrospirales  
 C:f--Nitrospiraceae  
 D:g--unidentified Nitrospiraceae  
 E:c--Betaproteobacteria  
 F:o--Burkholderiales  
 G:f--Comamonadaceae  
 H:f--Burkholderiaceae  
 I:o--Nitrosomonadales  
 J:f--Nitrosomonadaceae  
 K:g--unidentified Nitrosomonadaceae  
 L:o--Rhodocyclales  
 M:f--Rhodocyclaceae  
 N:c--Gammaproteobacteria  
 O:o--Oceanospirillales  
 P:f--Halomonadaceae  
 Q:g--Halomonas  
 R:o--Xanthomonadales  
 S:f--Xanthomonadaceae  
 T:c--Alphaproteobacteria  
 U:o--Sphingomonadales  
 V:f--Sphingomonadaceae  
 W:g--Sphingomonas  
 X:o--Rhodospirillales  
 Y:f--Rhodospirillaceae  
 Z:g--unidentified Rhodospirillaceae  
 a:o--Rhizobiales  
 b:f--Bradyrhizobiaceae  
 c:f--Xanthobacteraceae  
 d:c--unidentified Actinobacteria  
 e:o--Micrococcales  
 f:c--Bacilli  
 g:c--Clostridia  
 h:o--Clostridiales  
 i:o--Clostridiales

● P--ACTINOBACTERIA  
 ● P--BACTEROIDETES  
 ● P--FIRMICUTES  
 ● P--NITROSPIRAE  
 ● P--PROTEOBACTERIA

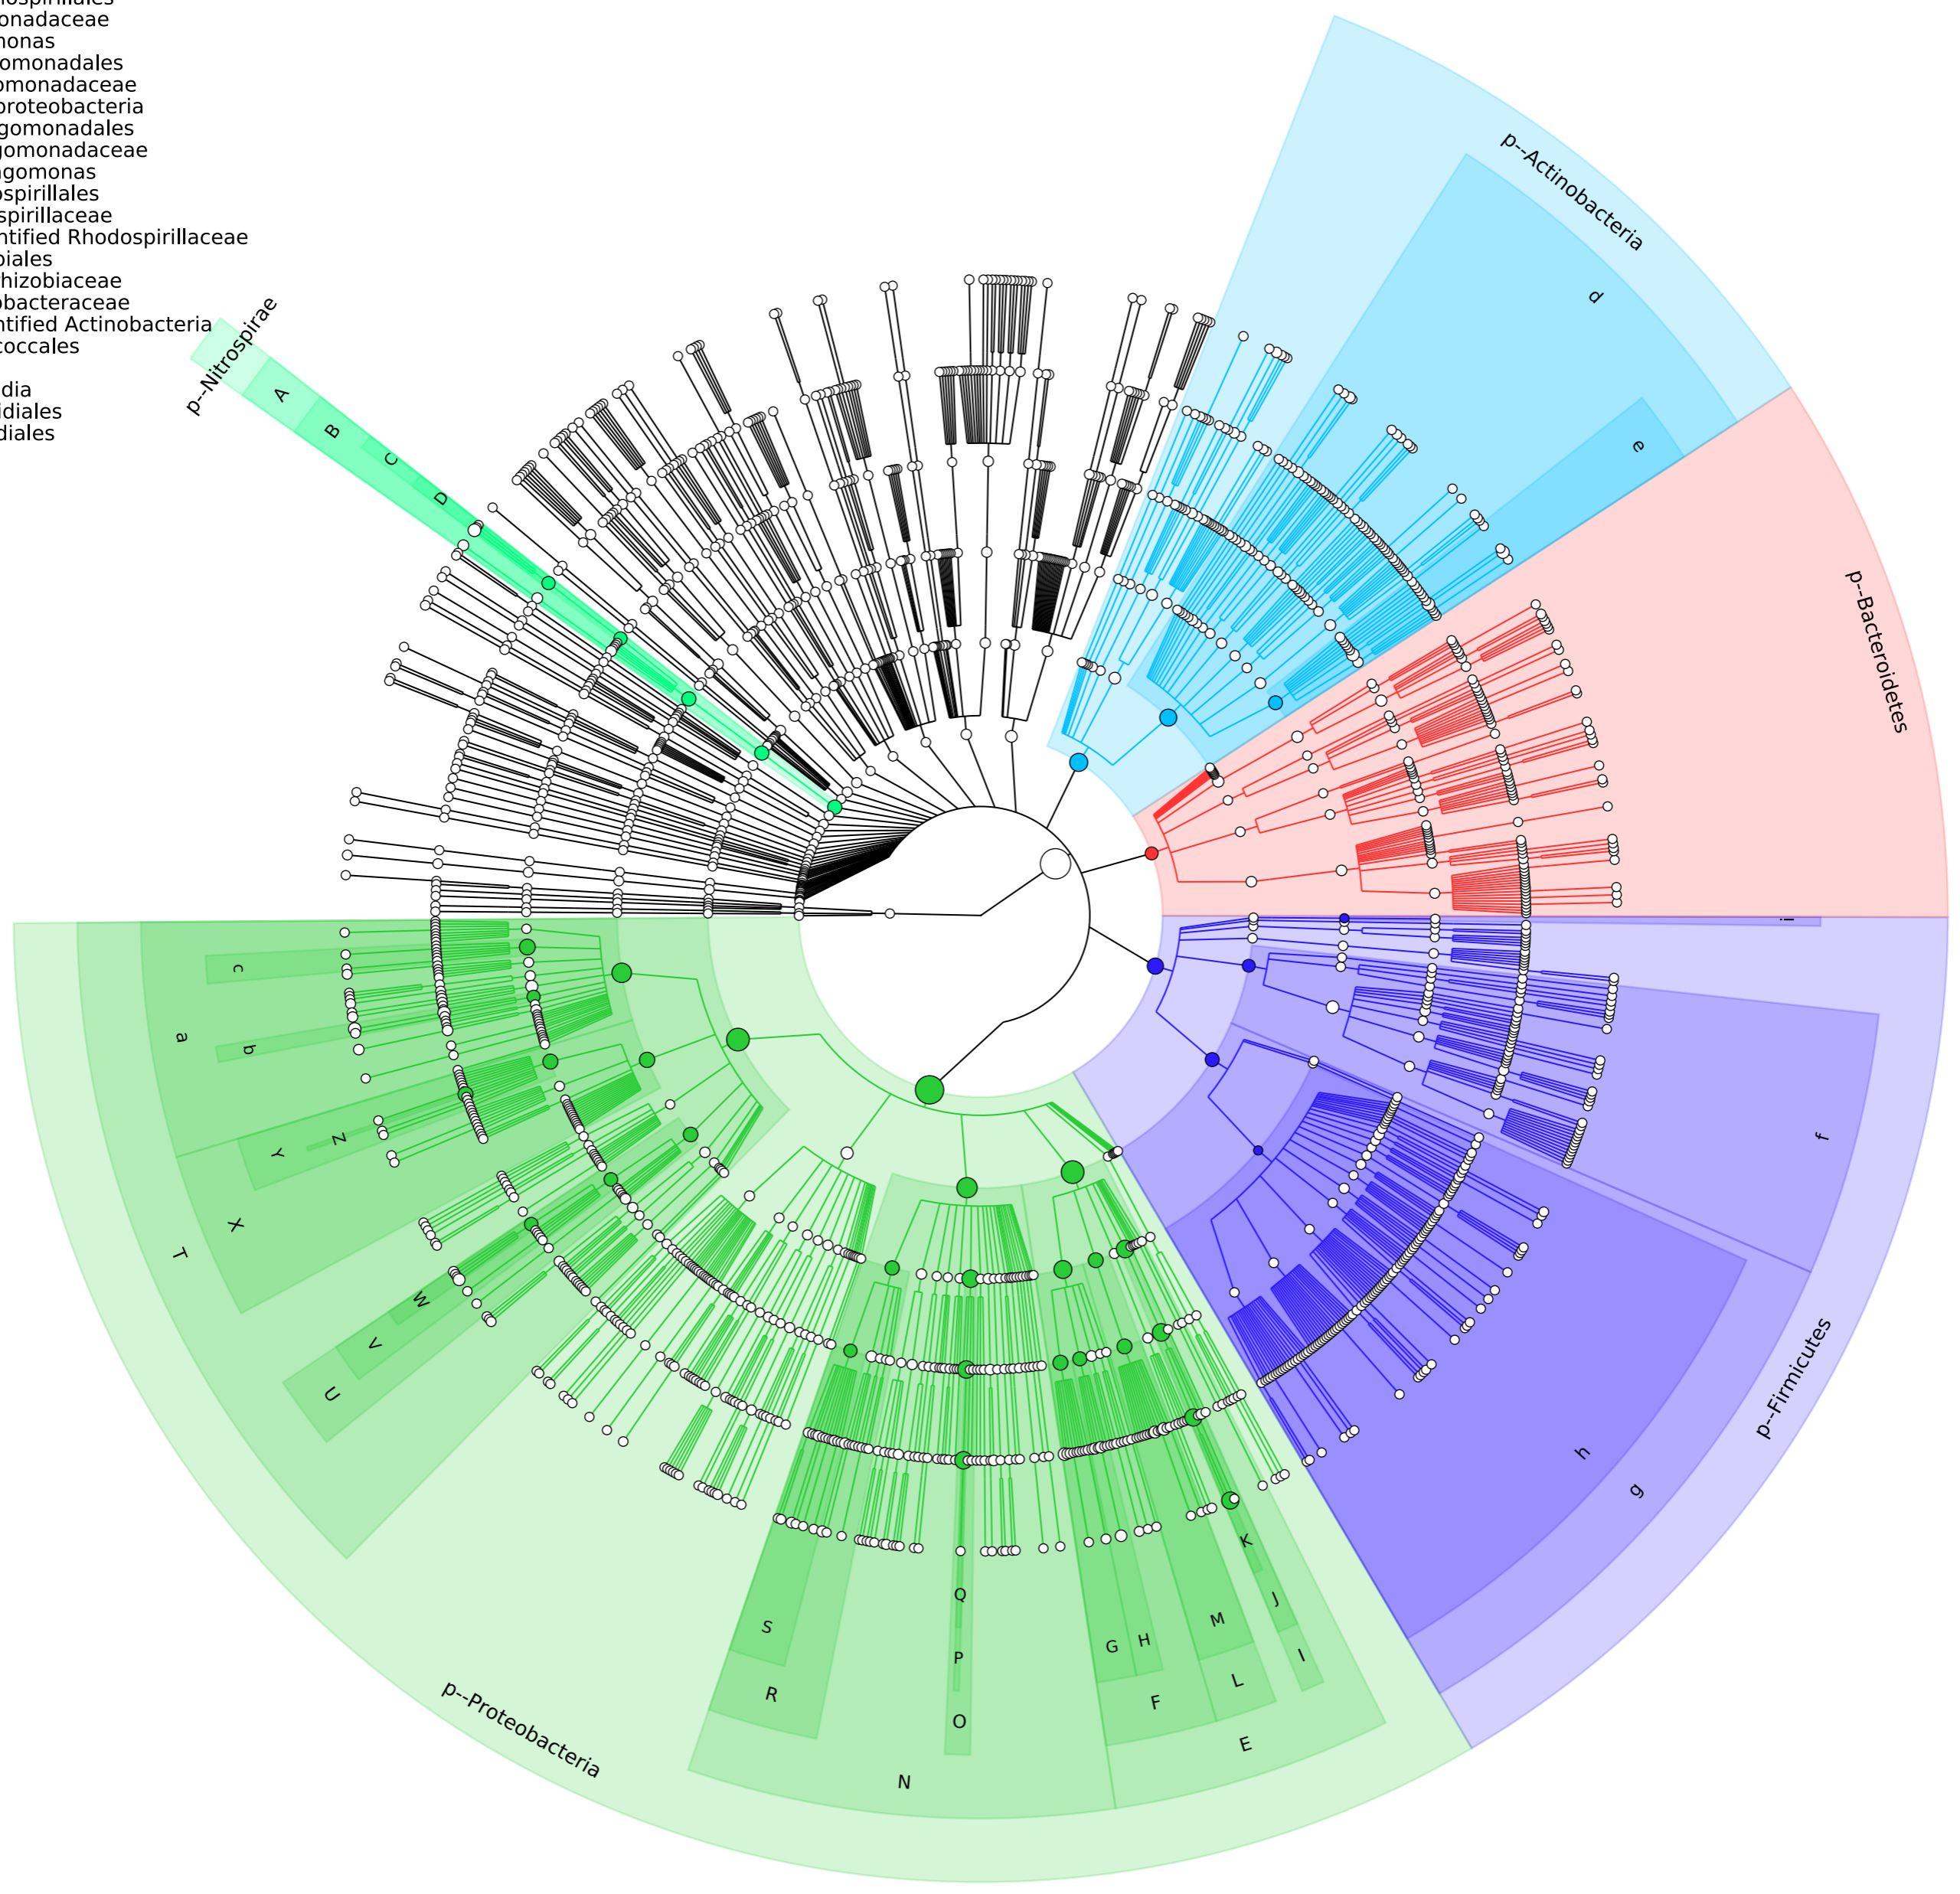

Supplement: peerj-06-5741-s015.pdf [file peerj-06-5741-s015.pdf]
