# Supplementary material for: Effects of wine-cap Stropharia cultivation on soil nutrients and bacterial communities in forestlands of northern China
Source: PubMed Central journal article supplement (PMC6183509; doi:10.7717/peerj.5741), 2018-10-09

- P--ACTINOBACTERIA
- P--BACTEROIDETES
- P--FIRMICUTES
- P--NITROSPIRAE
- P--PROTEOBACTERIA

- A:c--Flavobacteria
- B:o--Flavobacteriales
- C:c--Nitrospira
- D:o--Nitrospirales
- E:f--Nitrospiraceae
- F:g--unidentified Nitrospiraceae
- G:c--Deltaproteobacteria
- H:c--Betaproteobacteria
- I:o--Burkholderiales
- J:f--Comamonadaceae
- K:o--Nitrosomonadales
- L:f--Nitrosomonadaceae
- M:g--unidentified Nitrosomonadaceae
- N:c--Gammaproteobacteria
- O:o--Xanthomonadales
- P:f--Xanthomonadaceae
- Q:c--Alphaproteobacteria
- R:o--Sphingomonadales
- S:f--Sphingomonadaceae
- T:g--Sphingomonas
- U:o--Rhodospirillales
- V:f--Rhodospirillaceae
- W:g--unidentified Rhodospirillaceae
- X:o--Rhizobiales
- Y:f--Xanthobacteraceae
- Z:c--unidentified Actinobacteria
- a:o--Micrococcales
- b:f--Micrococcaceae
- c:g--Arthrobacter
- d:c--Bacilli
- e:o--Bacillales
- f:f--Planococcaceae

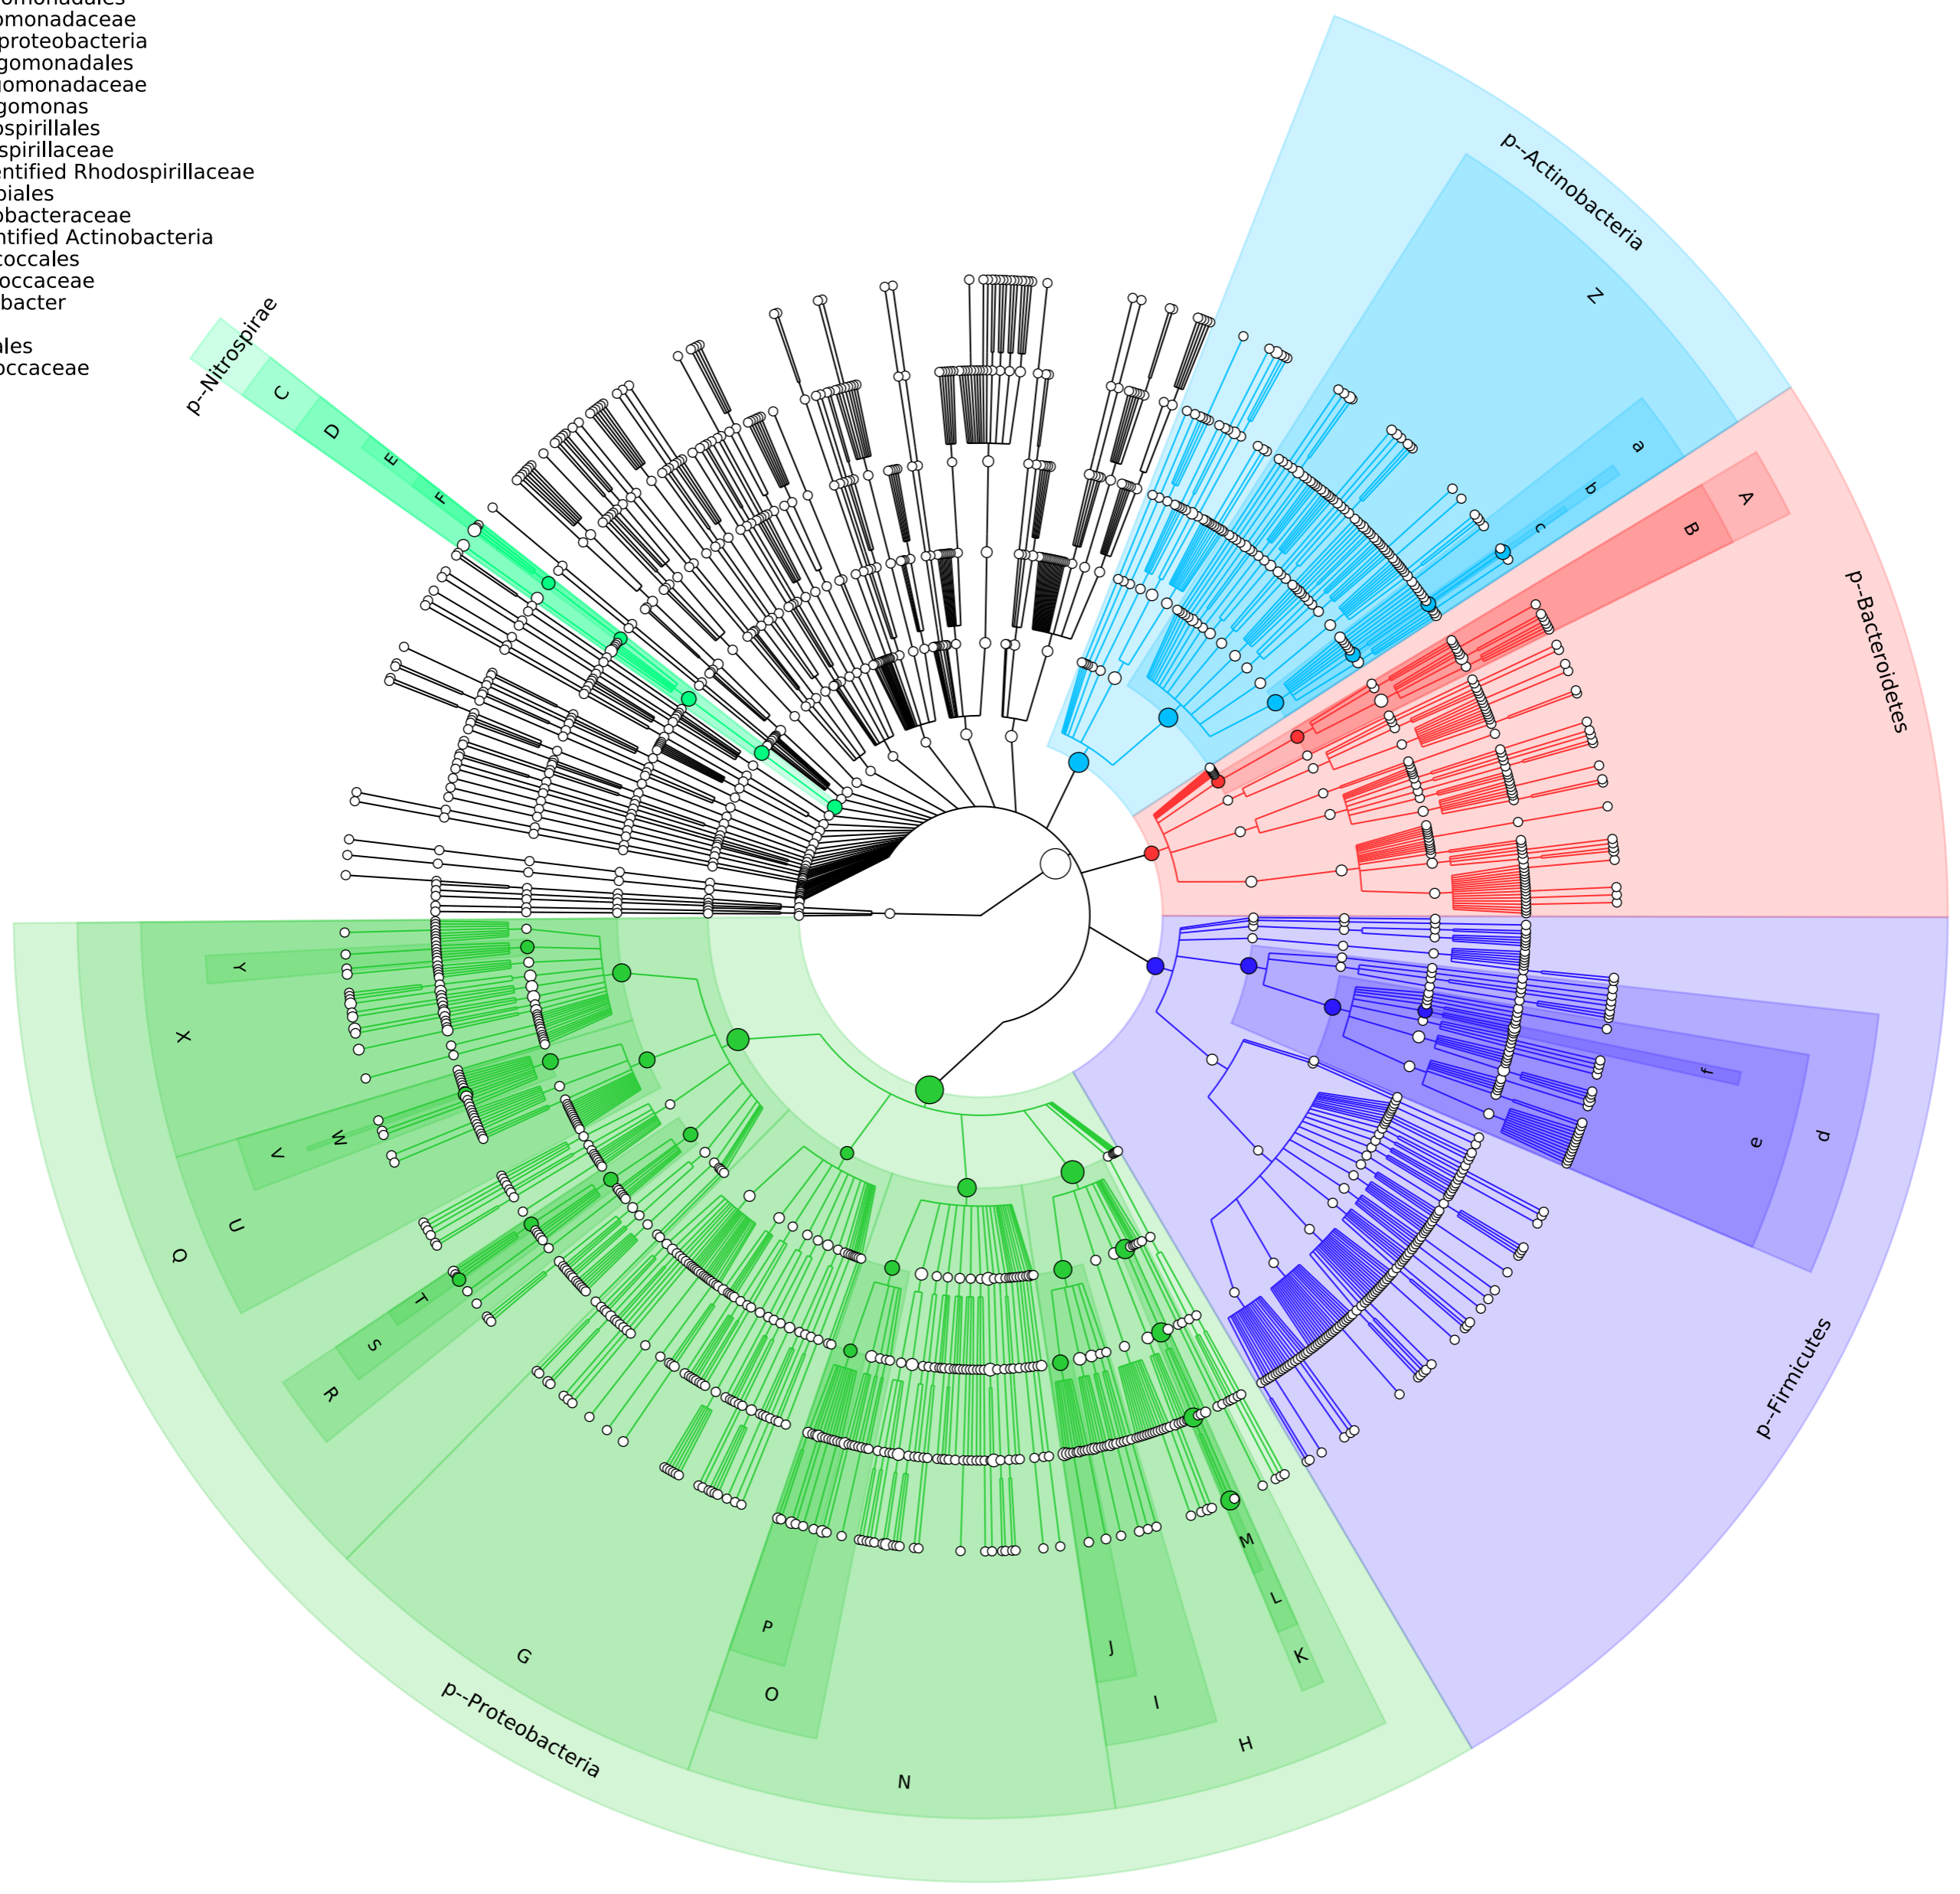

Supplement: peerj-06-5741-s016.pdf [file peerj-06-5741-s016.pdf]
