# Supplementary material for: Effects of wine-cap Stropharia cultivation on soil nutrients and bacterial communities in forestlands of northern China
Source: PubMed Central journal article supplement (PMC6183509; doi:10.7717/peerj.5741), 2018-10-09

- P--ACTINOBACTERIA
- P--FIRMICUTES
- P--NITROSPIRAE
- P--PROTEOBACTERIA

- A:c--Nitrospira
- B:o--Nitrospirales
- C:f--Nitrospiraceae
- D:g--unidentified Nitrospiraceae
- E:c--Deltaproteobacteria
- F:c--Betaproteobacteria
- G:o--Burkholderiales
- H:f--Comamonadaceae
- I:g--Piscinibacter
- J:o--Nitrosomonadales
- K:f--Nitrosomonadaceae
- L:g--unidentified Nitrosomonadaceae
- M:c--Gammaproteobacteria
- N:o--Xanthomonadales
- O:f--Xanthomonadaceae
- P:c--Alphaproteobacteria
- Q:o--Sphingomonadales
- R:f--Sphingomonadaceae
- S:g--Sphingomonas
- T:o--Rhodospirillales
- U:f--Rhodospirillaceae
- V:g--unidentified Rhodospirillaceae
- W:o--Rhizobiales
- X:f--Bradyrhizobiaceae
- Y:f--Xanthobacteraceae
- Z:c--Thermoleophilia
- a:c--unidentified Actinobacteria
- b:o--Micrococcales
- c:f--Micrococcaceae
- d:g--Arthrobacter
- e:c--Bacilli
- f:o--Bacillales
- g:c--Clostridia
- h:o--Clostridiales
- i:o--Clostridiales

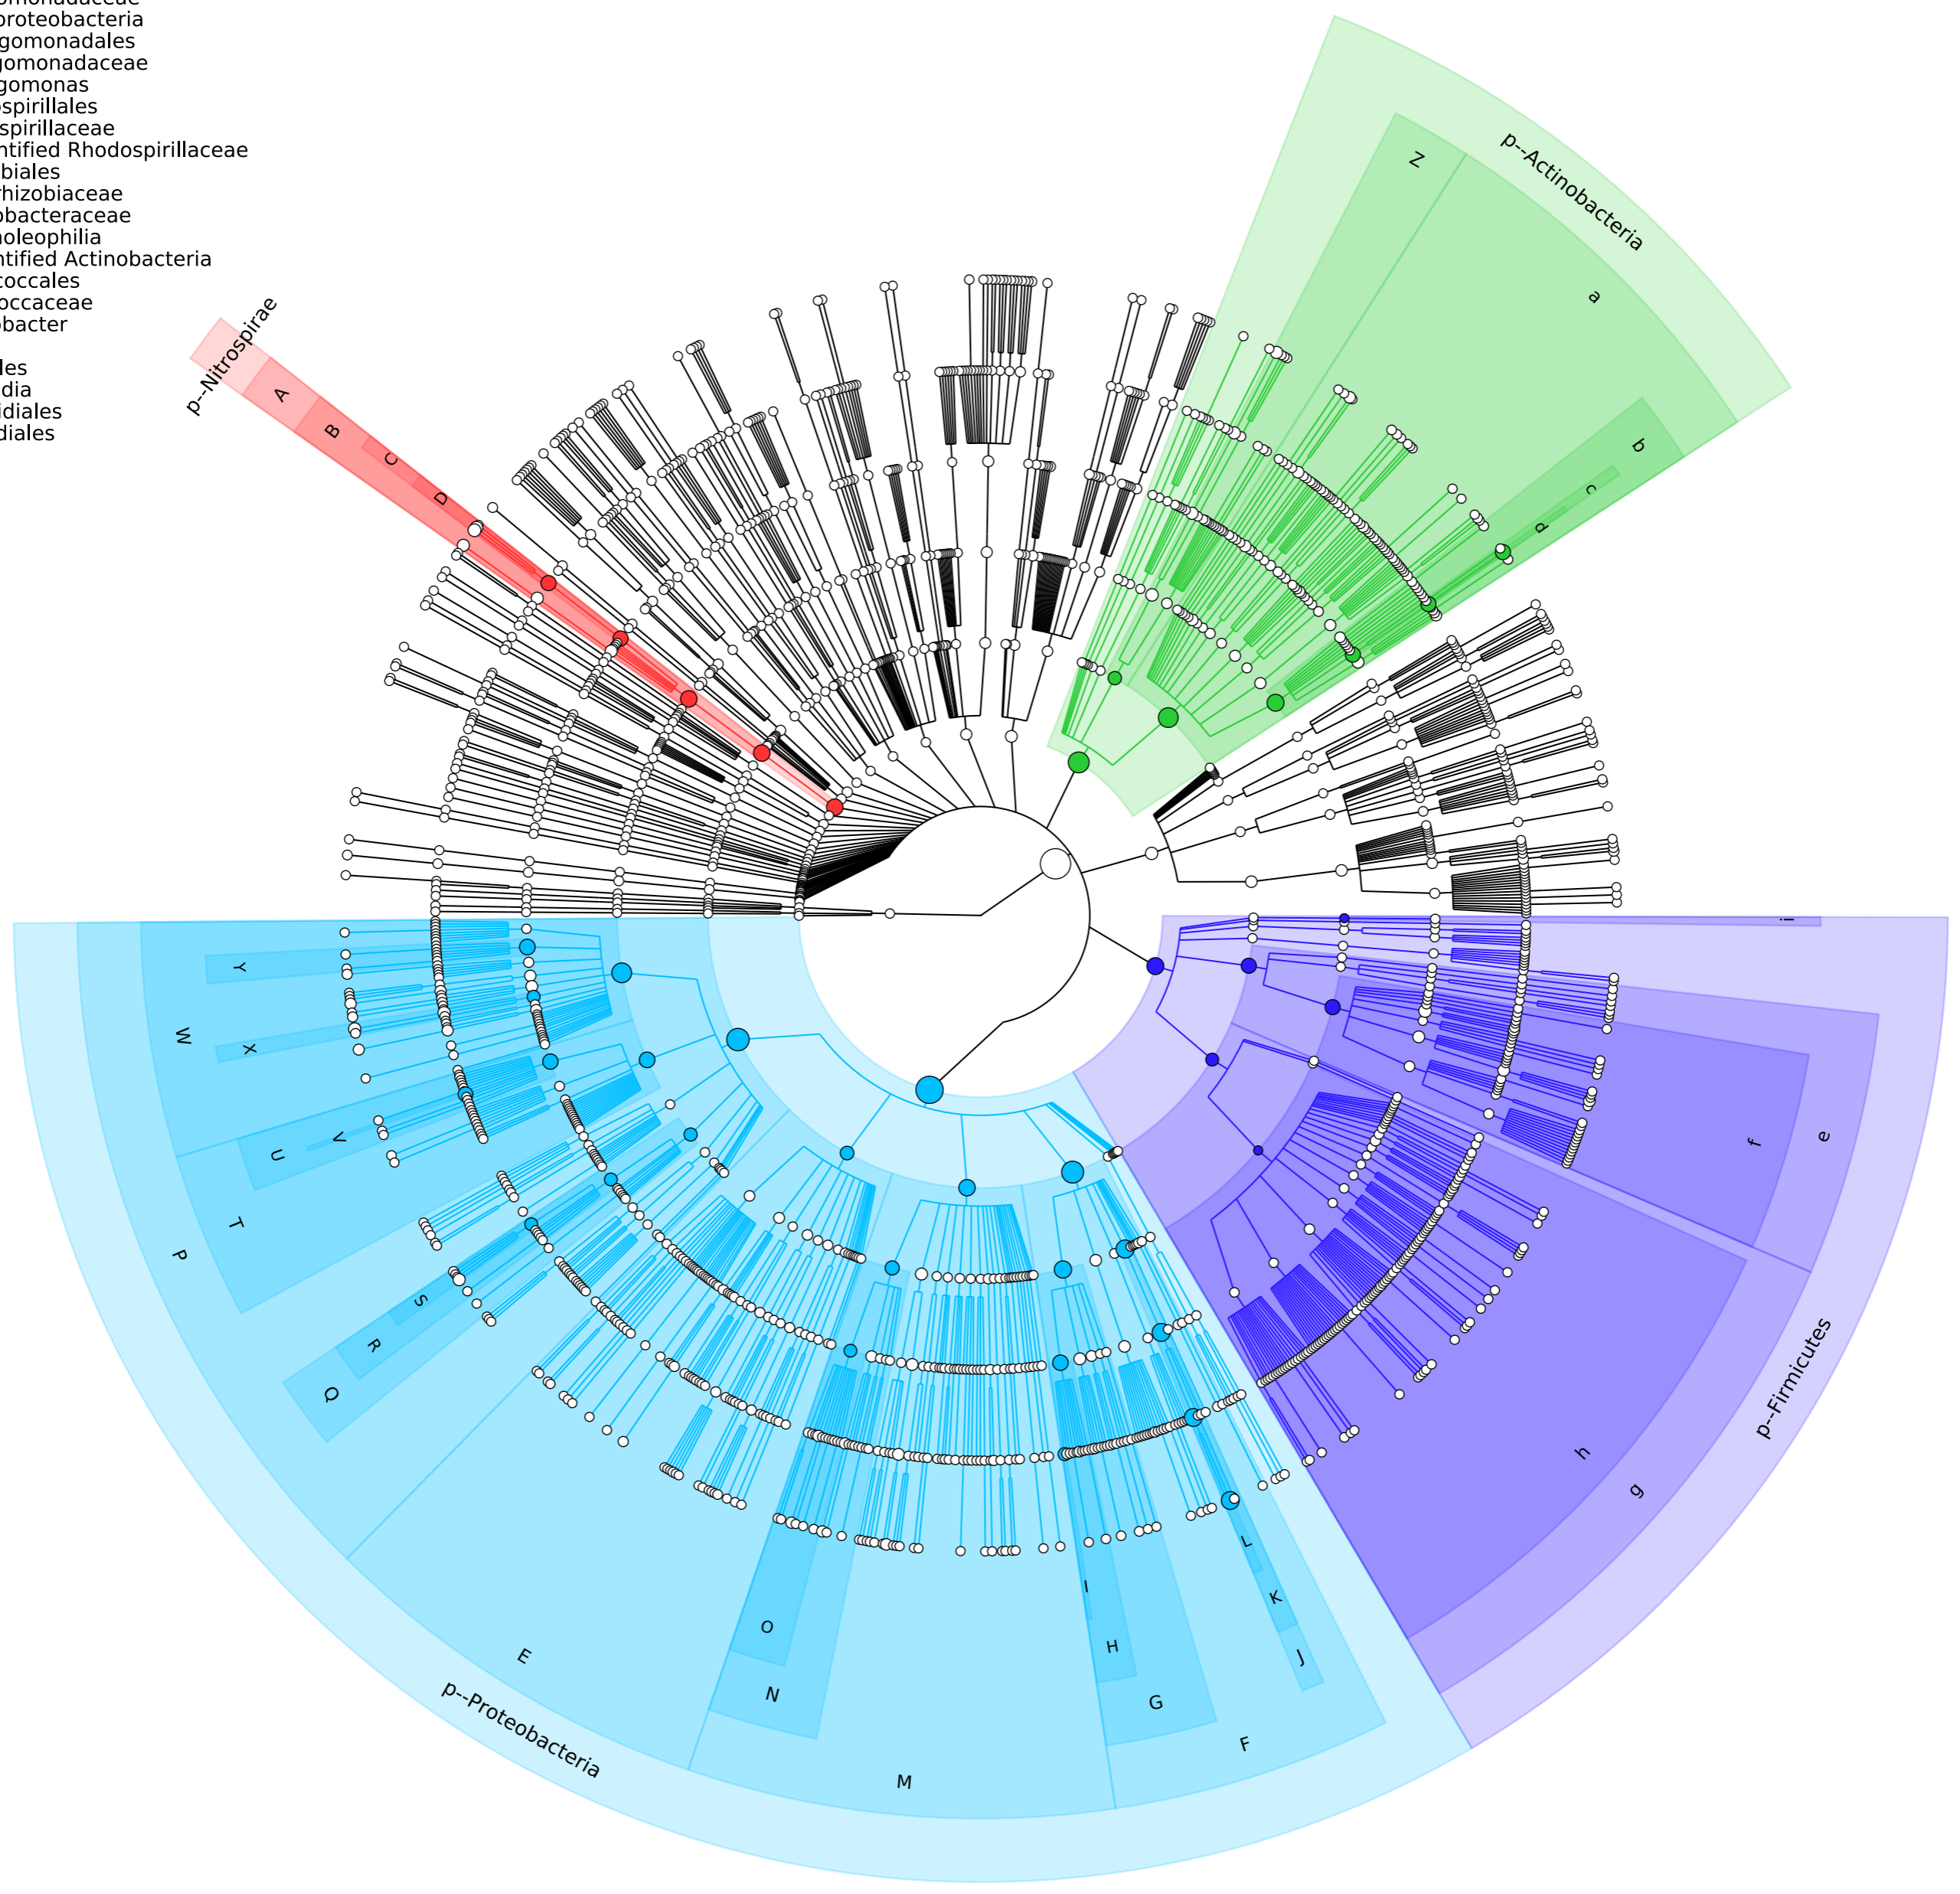

Supplement: peerj-06-5741-s018.pdf [file peerj-06-5741-s018.pdf]
