# Supplementary material for: Effects of wine-cap Stropharia cultivation on soil nutrients and bacterial communities in forestlands of northern China
Source: PubMed Central journal article supplement (PMC6183509; doi:10.7717/peerj.5741), 2018-10-09

- P--ACTINOBACTERIA
- P--BACTEROIDETES
- P--CHLOROFLEXI
- P--FIRMICUTES
- P--NITROSPIRAE
- P--PROTEOBACTERIA

- A:c--Nitrospira
- B:o--Nitrospirales
- C:c--Deltaproteobacteria
- D:c--Betaproteobacteria
- E:o--Burkholderiales
- F:f--Comamonadaceae
- G:o--Nitrosomonadales
- H:f--Nitrosomonadaceae
- I:g--unidentified Nitrosomonadaceae
- J:c--Gammaproteobacteria
- K:o--Xanthomonadales
- L:c--Alphaproteobacteria
- M:o--Sphingomonadales
- N:f--Sphingomonadaceae
- O:o--Rhodospirillales
- P:f--Rhodospirillaceae
- Q:g--unidentified Rhodospirillaceae
- R:o--Rhizobiales
- S:f--Bradyrhizobiaceae
- T:f--Xanthobacteraceae
- U:c--Anaerolineae
- V:o--Anaerolineales
- W:f--Anaerolineaceae
- X:g--Ornatilinea
- Y:c--unidentified Actinobacteria
- Z:o--Micrococcales
- a:f--Micrococcaceae
- b:g--Arthrobacter
- c:c--Bacilli
- d:o--Bacillales
- e:c--Clostridia
- f:o--Clostridiales
- g:o--Clostridiales

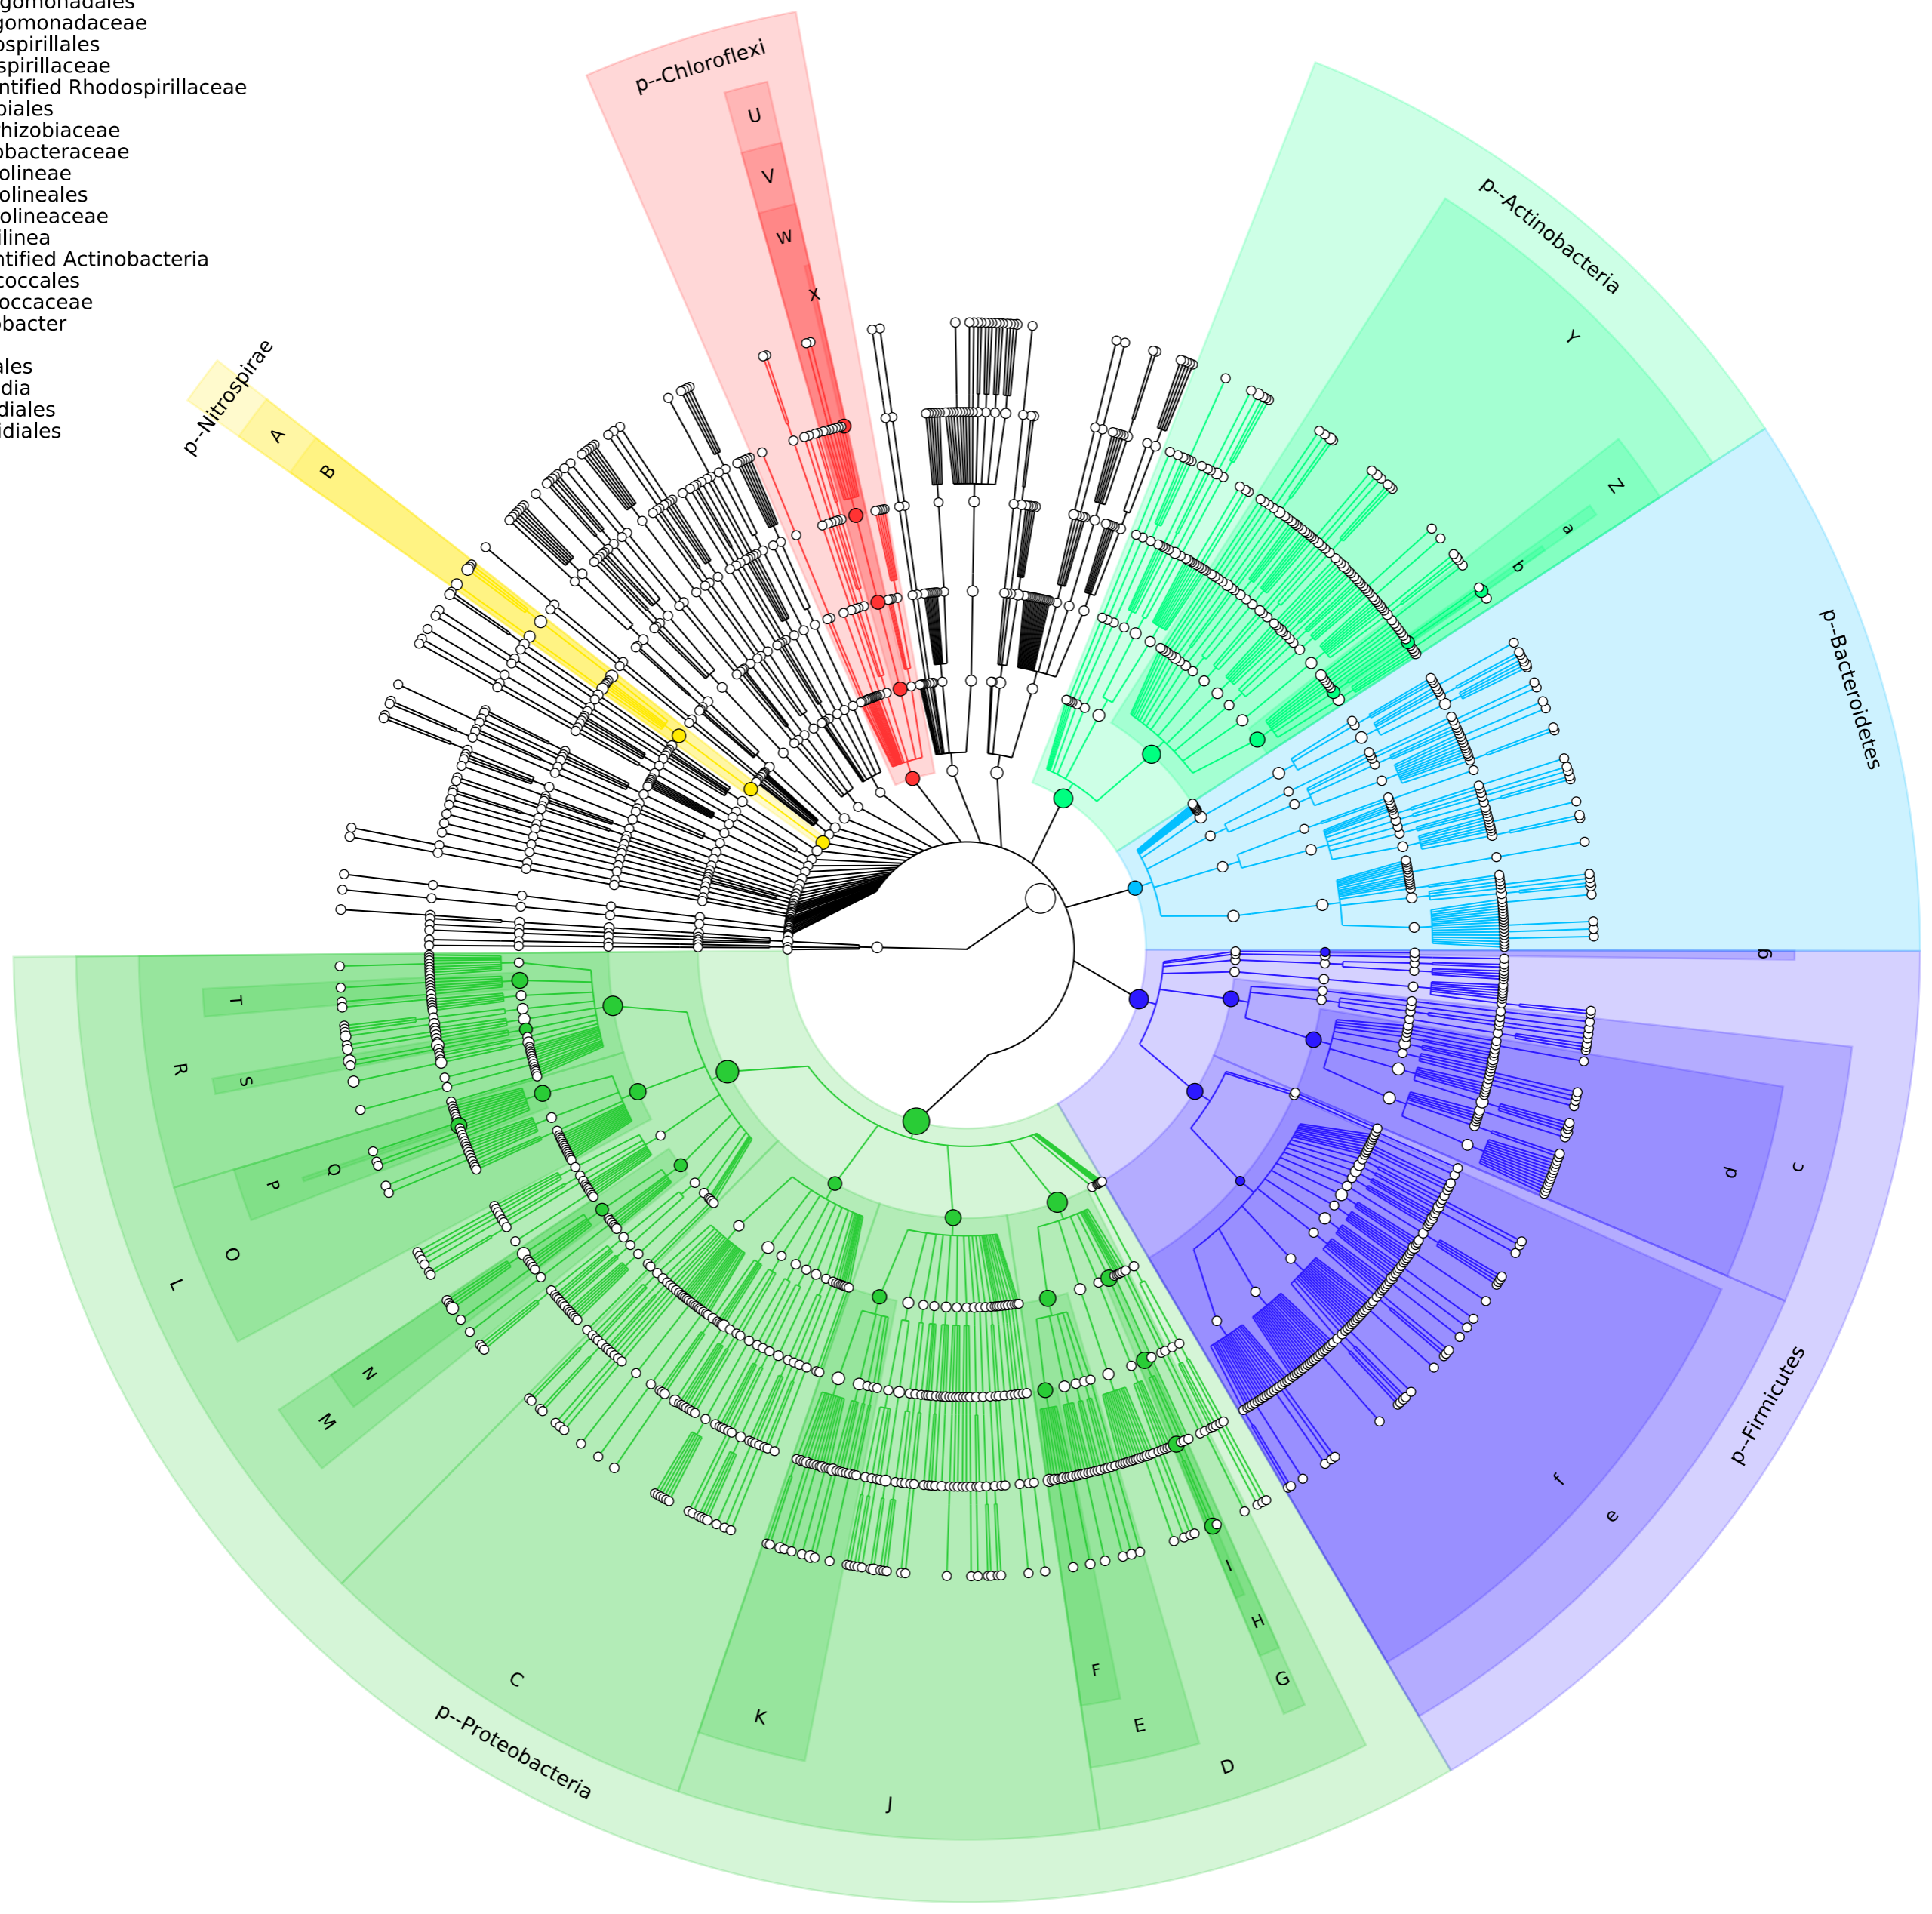

Supplement: peerj-06-5741-s019.pdf [file peerj-06-5741-s019.pdf]
