# Supplementary material for: Effects of wine-cap Stropharia cultivation on soil nutrients and bacterial communities in forestlands of northern China
Source: PubMed Central journal article supplement (PMC6183509; doi:10.7717/peerj.5741), 2018-10-09

- P--ACTINOBACTERIA
- P--BACTEROIDETES
- P--FIRMICUTES
- P--NITROSPIRAE
- P--PROTEOBACTERIA

- A:c--Nitrospira
- B:o--Nitrospirales
- C:c--Deltaproteobacteria
- D:c--Betaproteobacteria
- E:o--Burkholderiales
- F:f--Comamonadaceae
- G:g--Piscinibacter
- H:o--Nitrosomonadales
- I:f--Nitrosomonadaceae
- J:g--unidentified Nitrosomonadaceae
- K:o--Rhodocyclales
- L:f--Rhodocyclaceae
- M:c--Gammaproteobacteria
- N:o--Pseudomonadales
- O:o--Thiotrichales
- P:f--Piscirickettsiaceae
- Q:g--Methylophaga
- R:o--Xanthomonadales
- S:f--unidentified Xanthomonadales
- T:g--unidentified Xanthomonadales
- U:f--Xanthomonadaceae
- V:c--Alphaproteobacteria
- W:o--Sphingomonadales
- X:o--Rhodospirillales
- Y:f--Rhodospirillaceae
- Z:g--unidentified Rhodospirillaceae
- a:o--Rhizobiales
- b:f--Xanthobacteraceae
- c:c--unidentified Actinobacteria
- d:o--Micrococcales
- e:c--Bacilli
- f:c--Clostridia
- g:o--Clostridiales
- h:o--Clostridiales

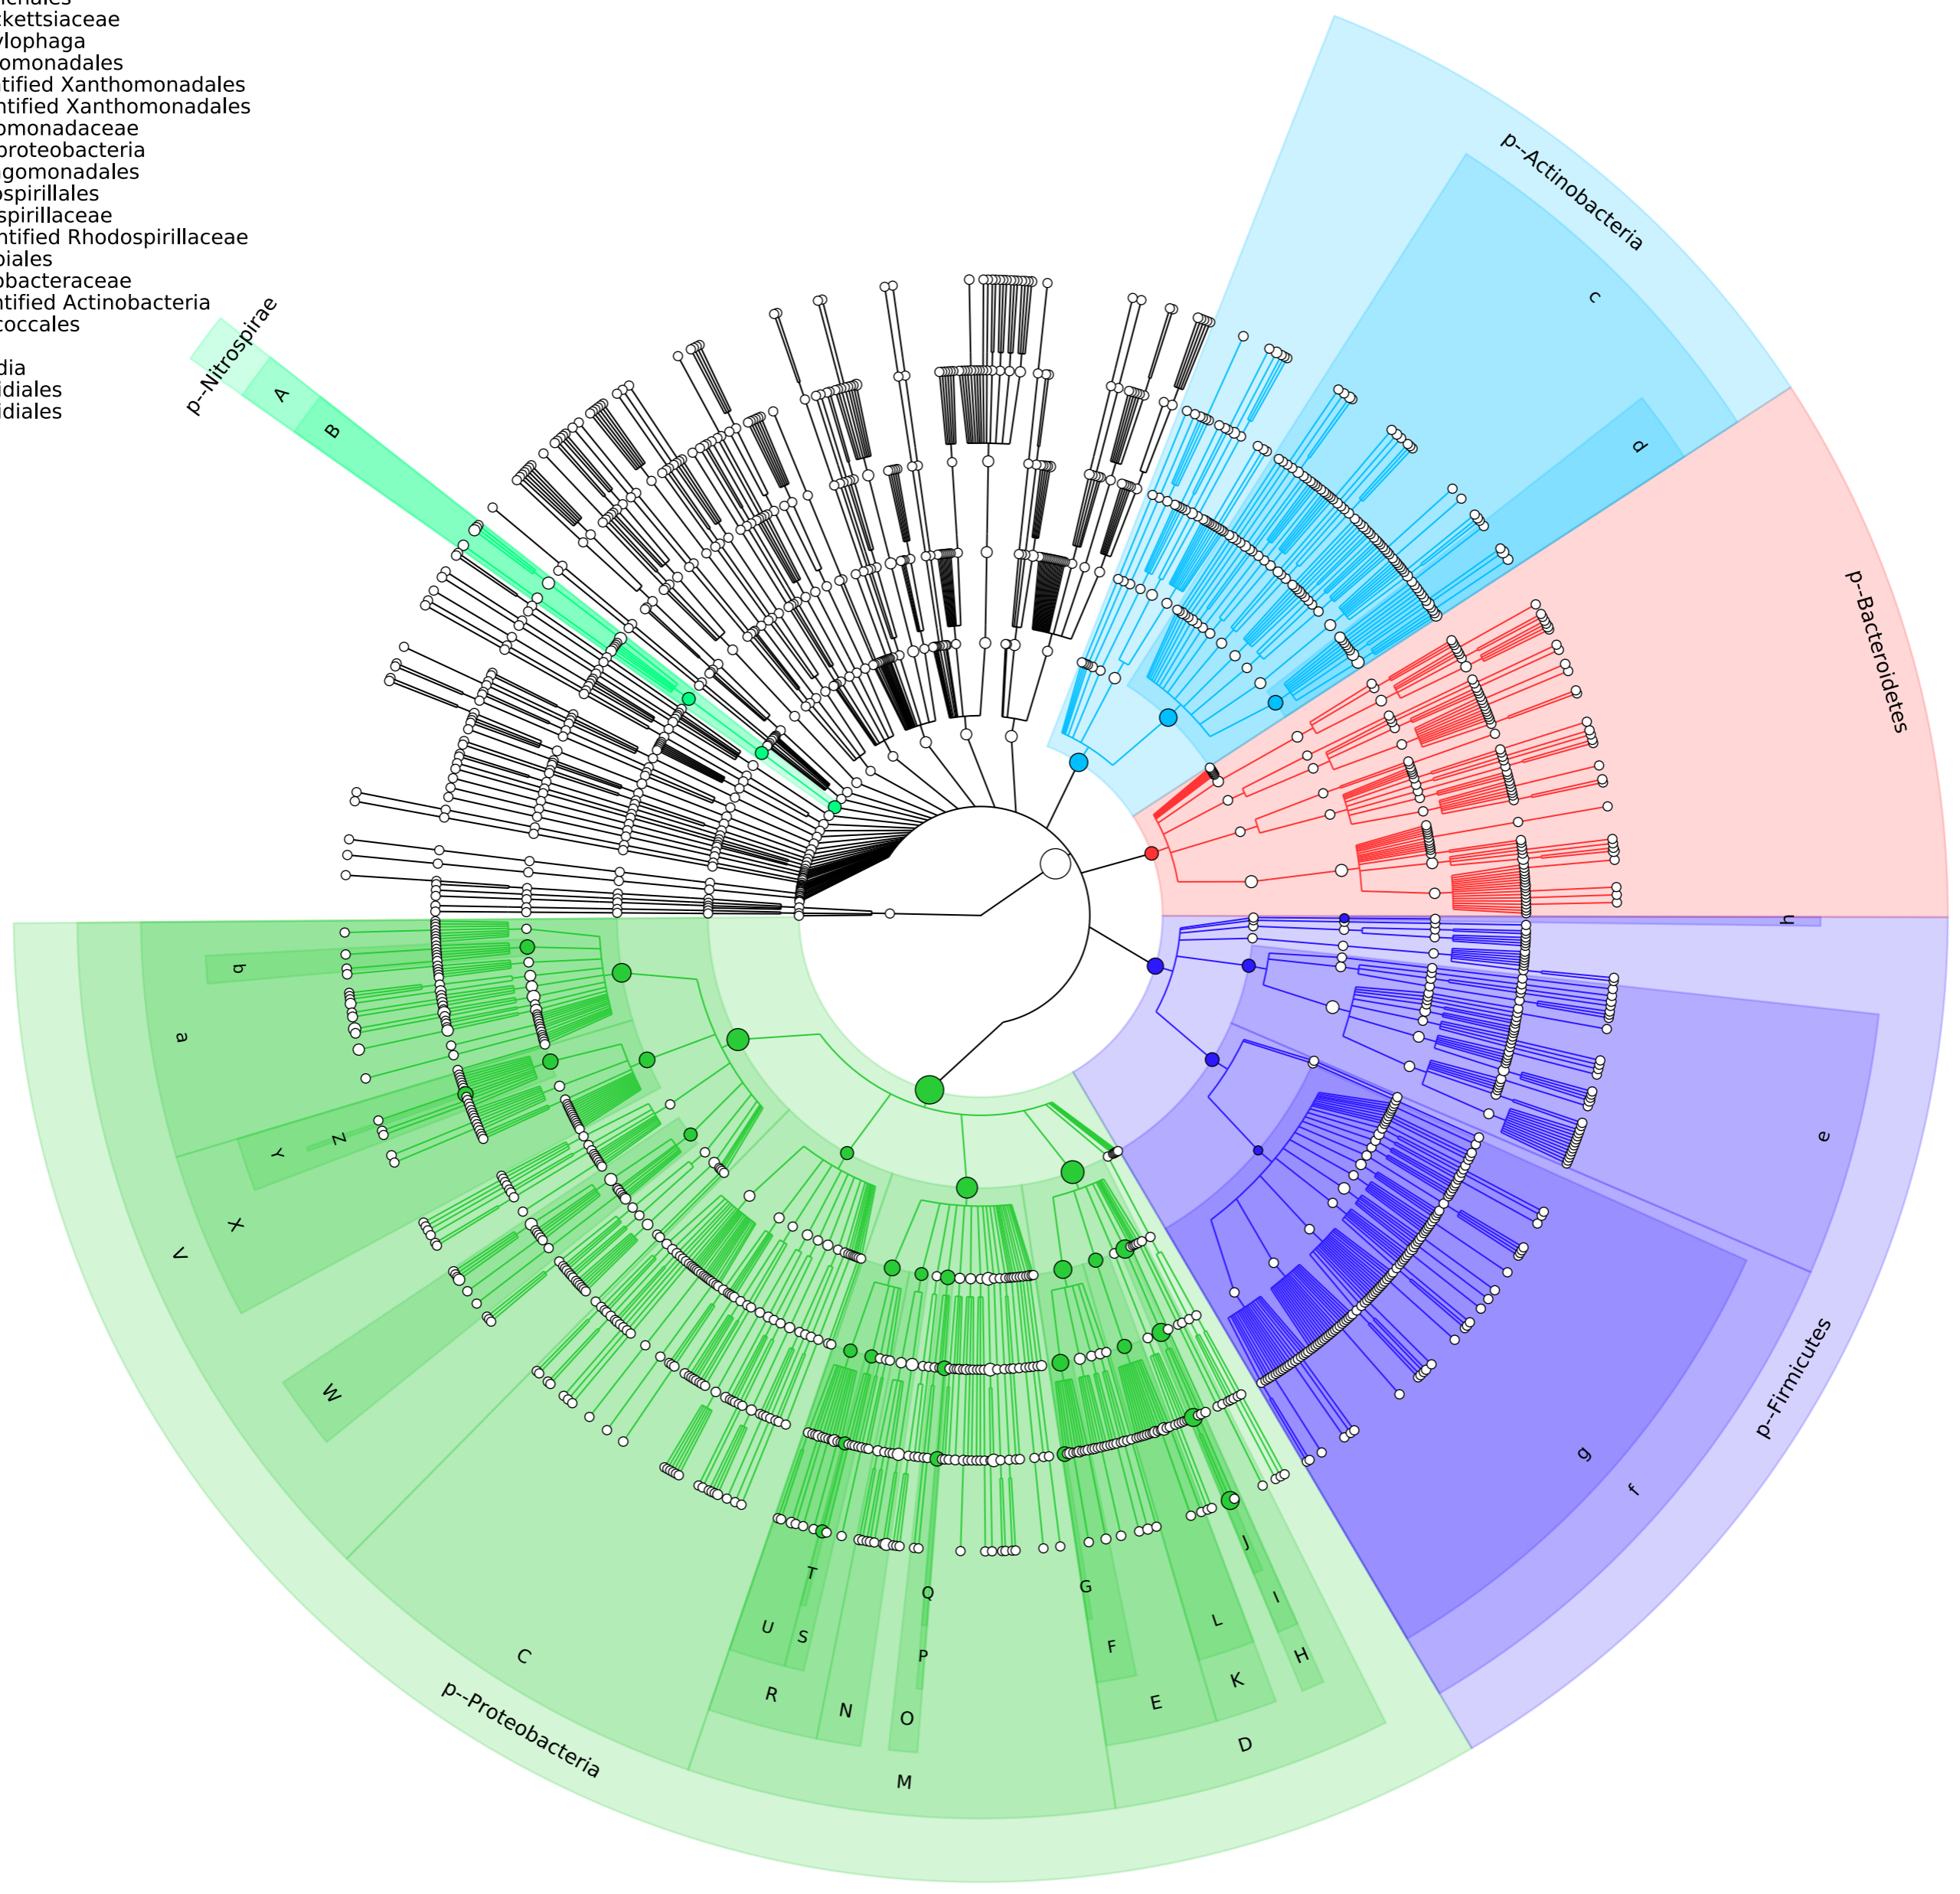

Supplement: peerj-06-5741-s020.pdf [file peerj-06-5741-s020.pdf]
