# Supplementary material for: Effects of wine-cap Stropharia cultivation on soil nutrients and bacterial communities in forestlands of northern China
Source: PubMed Central journal article supplement (PMC6183509; doi:10.7717/peerj.5741), 2018-10-09

- P--ACTINOBACTERIA
- P--BACTEROIDETES
- P--FIRMICUTES
- P--NITROSPIRAE
- P--PROTEOBACTERIA

- A:c--Nitrospira
- B:o--Nitrospirales
- C:c--Deltaproteobacteria
- D:c--Betaproteobacteria
- E:o--Burkholderiales
- F:f--Comamonadaceae
- G:o--Nitrosomonadales
- H:f--Nitrosomonadaceae
- I:g--unidentified Nitrosomonadaceae
- J:c--Gammaproteobacteria
- K:o--Pseudomonadales
- L:f--Pseudomonadaceae
- M:g--Pseudomonas
- N:o--Xanthomonadales
- O:f--unidentified Xanthomonadales
- P:f--Xanthomonadaceae
- Q:g--Lysobacter
- R:c--Alphaproteobacteria
- S:o--Sphingomonadales
- T:f--Sphingomonadaceae
- U:g--Sphingomonas
- V:o--Rhodospirillales
- W:f--Rhodospirillaceae
- X:g--unidentified Rhodospirillaceae
- Y:o--Rhizobiales
- Z:f--Bradyrhizobiaceae
- a:f--Xanthobacteraceae
- b:c--unidentified Actinobacteria
- c:o--Micrococcales
- d:c--Bacilli
- e:o--Bacillales
- f:f--Planococcaceae

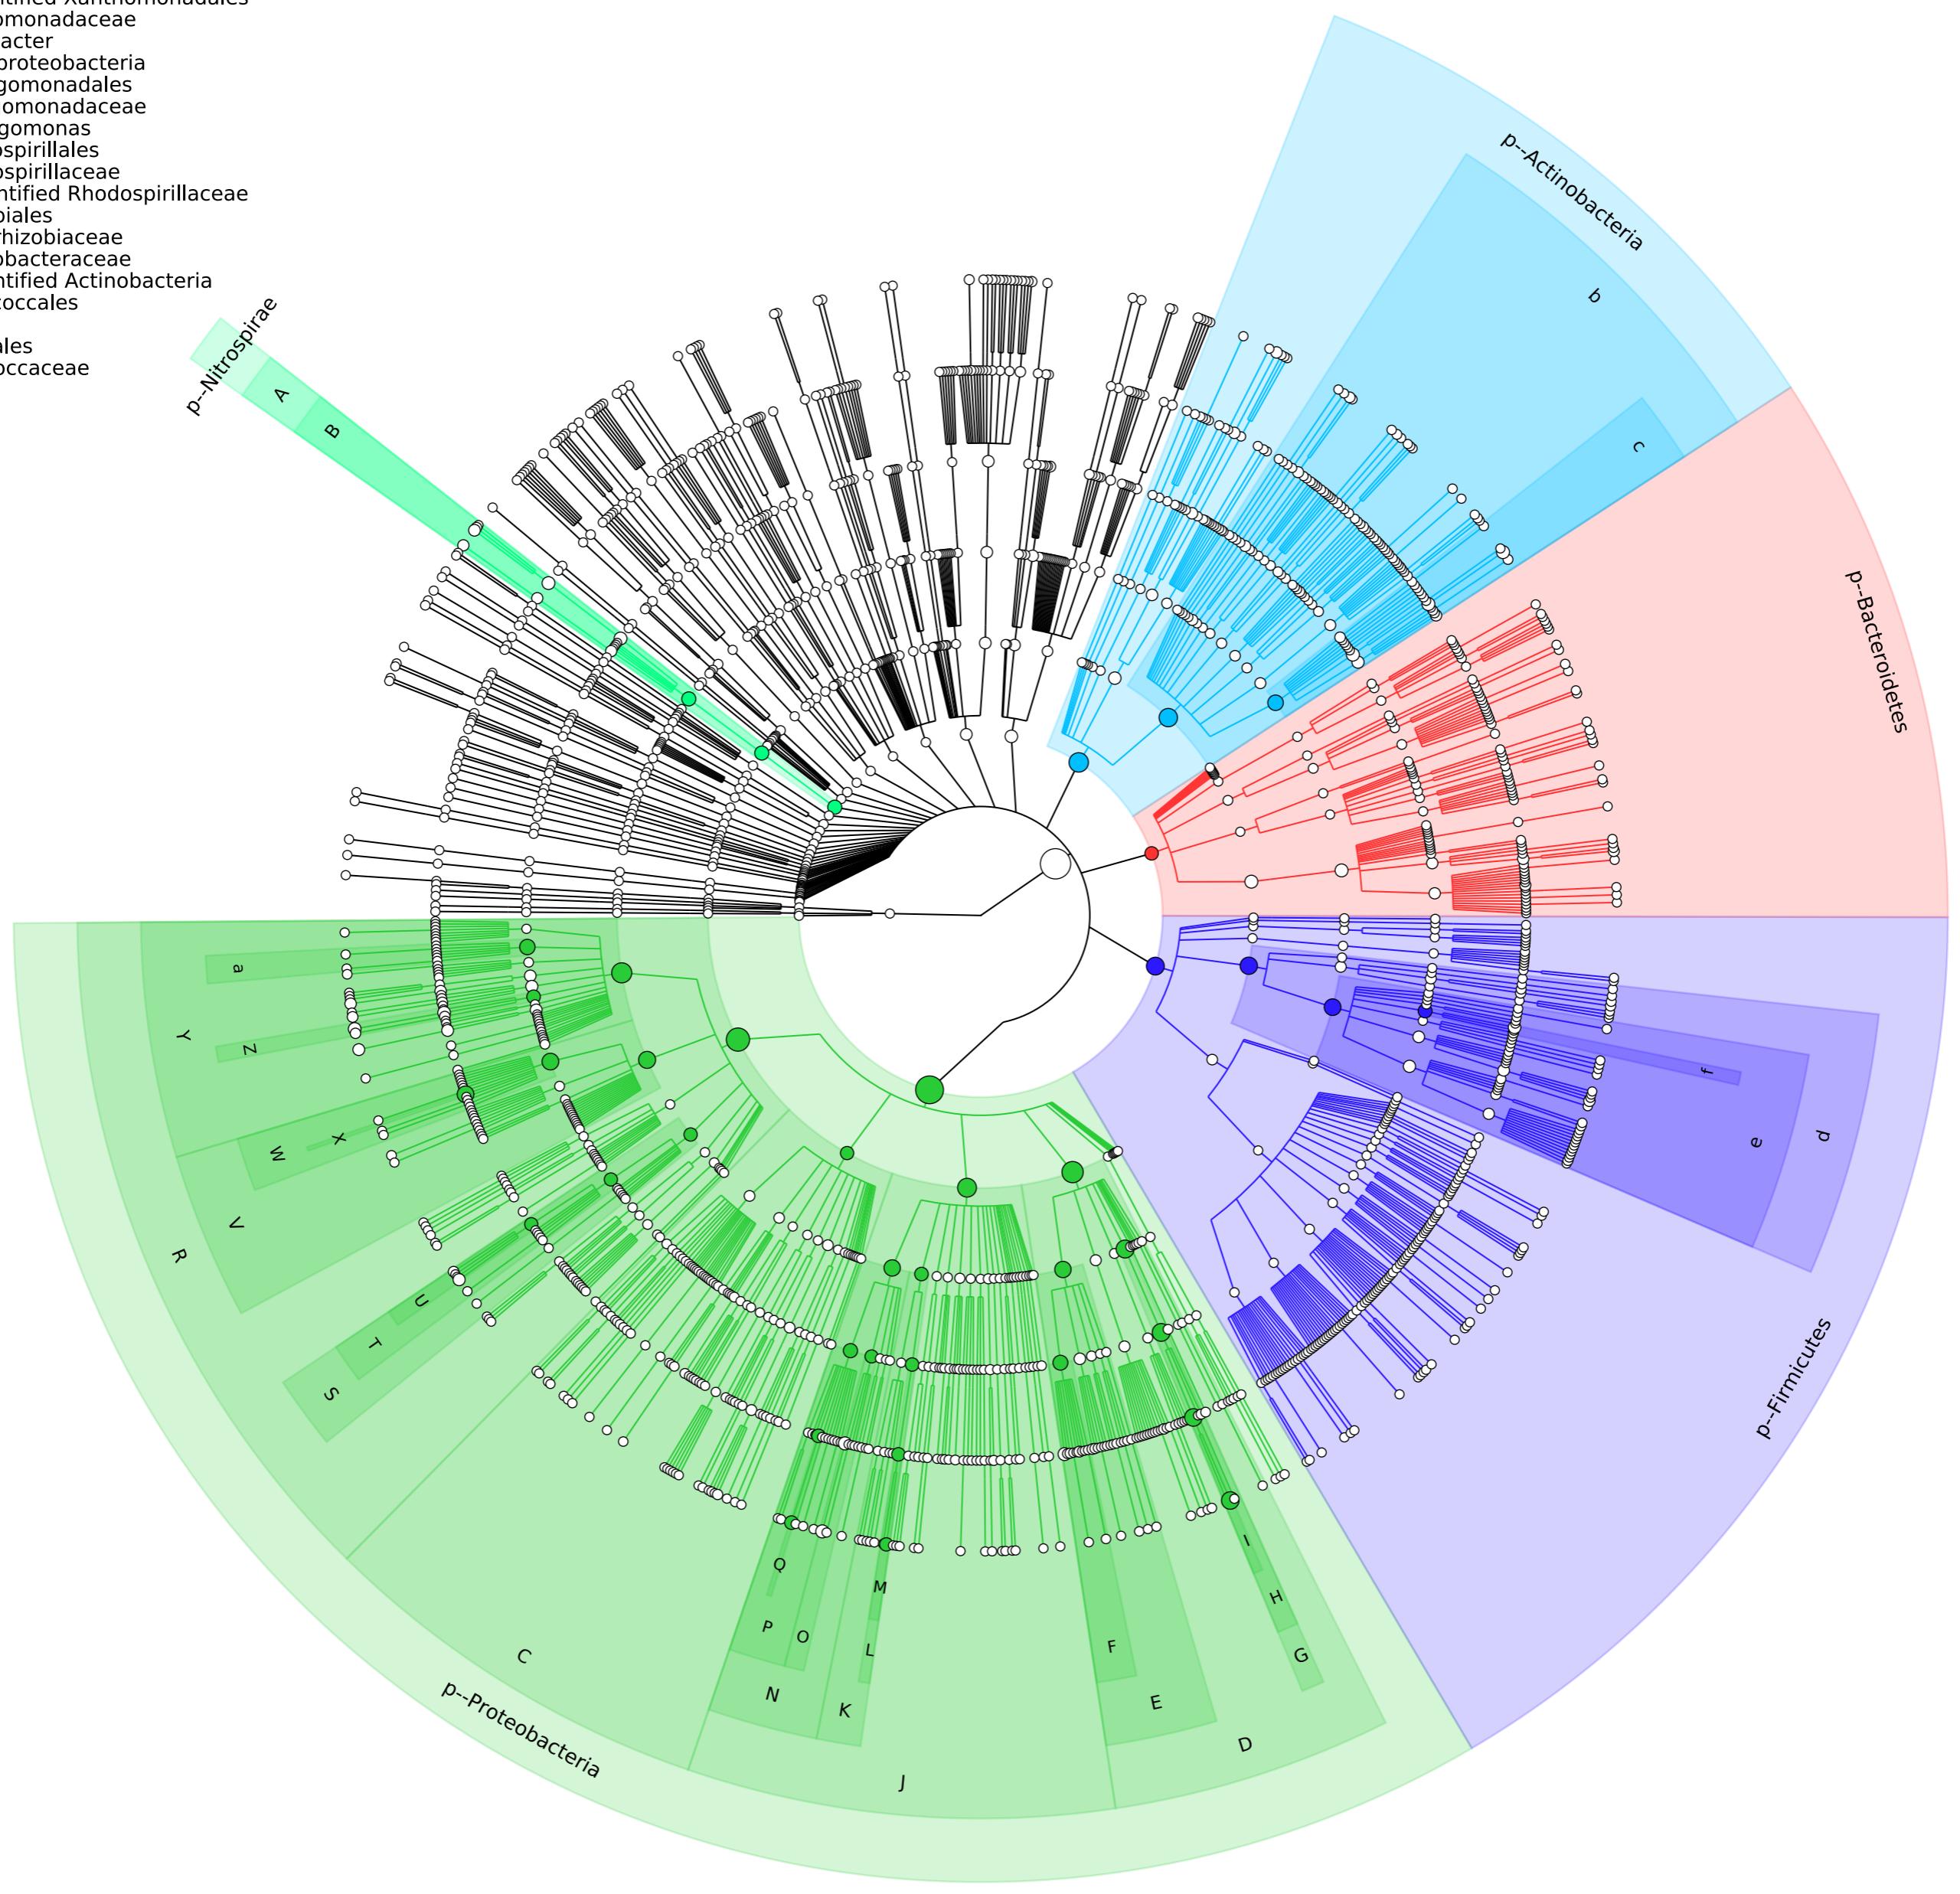

Supplement: peerj-06-5741-s021.pdf [file peerj-06-5741-s021.pdf]
