# Supplementary material for: Effects of wine-cap Stropharia cultivation on soil nutrients and bacterial communities in forestlands of northern China
Source: PeerJ. 2018 Oct 9;6:e5741. doi: 10.7717/peerj.5741 (PMC6183509; doi:10.7717/peerj.5741)
Supplement: Supplemental Information 2 [file peerj-06-5741-s023.xlsx]

## Sheet: Sheet2
Soil properties according to different cultivation years of Stropharia rugosoannulata.
Treatment	pH	FC (%)	OM (g/Kg)	TN (g/Kg)	TP (g/Kg)	AN (mg/Kg)	AP (mg/Kg)	AK (mg/Kg)
Y000	6.905	16.6079	8.03158	0.436402	0.403771	67.6184	30.5977	101.3
	6.819	17.717	7.95409	0.431162	0.418787	68.1721	30.598	100.8
	6.926	22.243	8.02805	0.457055	0.404523	67.7651	30.5741	101.25
Y010	6.929	15.6725	9.99508	0.478327	0.326226	39.1755	40.5112	119.5
	6.763	22.5	10.1264	0.483148	0.321776	38.7324	40.5833	119.4
	6.847	20.4477	9.70349	0.470013	0.330278	39.6426	40.4984	119.2
Y011	6.941	15.2301	8.8668	0.476605	0.359773	57.8305	53.9182	94.9
	6.953	20.8713	8.96535	0.482976	0.352318	57.8924	53.6238	95.3
	7.02	18.266	8.9476	0.462824	0.35942	58.328	54.2847	94.7
Y001	6.93	16.3982	10.959	0.214482	0.376963	38.4293	37.802	107
	6.823	16.04	10.448	0.224587	0.38249	38.1847	37.7456	106.5
	6.948	20.6204	9.92537	0.217455	0.392374	37.9234	37.8924	105.3
Y101	6.952	23.2249	23.7074	0.9329	0.585131	103.349	88.2126	152.3
	6.896	22.5851	23.7643	0.93845	0.553793	102.677	88.3784	152.3
Y101	6.779	22.3594	22.8723	0.974233	0.57823	103.373	88.2812	151.7
